# Supplementary material for: Nitrous oxide inhibition of methanogenesis represents an underappreciated greenhouse gas emission feedback
Source: PubMed Central journal article supplement (PMC10960958; doi:10.1093/ismejo/wrae027), 2024-03-06
Supplement: supplemental_table_s13_wrae027.pdf [file supplemental_table_s13_wrae027.pdf]

Table S13. Relative abundances of the taxa represented by the actual sequence variants derived from 16S rRNA gene amplicon library analysis of all mixed culture samples. Taxonomy is presented to genus-level resolution.

| Taxonomy   |                      |                       |                                       |                                       |                                   | Relative abundance of indicated taxon |                   |                  |                        |               |                     |
|------------|----------------------|-----------------------|---------------------------------------|---------------------------------------|-----------------------------------|---------------------------------------|-------------------|------------------|------------------------|---------------|---------------------|
| kingdom    | phylum               | class                 | order                                 | family                                | genus                             | YCY-17 (H2)                           | YCY-18 (H2 + N2O) | YCY-19 (Acetate) | YCY-20 (Acetate + N2O) | YCY-21 (MeOH) | YCY-22 (MeOH + N2O) |
| d_Bacteria | p_Campylobacterota   | c_Campylobacteria     | o_Campylobacterales                   | f_Sulfurospirillaceae                 | g_Sulfurospirillum                | 0.005404085                           | 0.274561404       | 0.000281326      | 0.000867364            | 0.024420045   | 0.607511258         |
| d_Bacteria | p_Proteobacteria     | c_Gammaproteobacteria | o_Enterobacteriales                   | f_Enterobacteriaceae                  | g_Citrobacter                     | 0                                     | 0                 | 0.097863801      | 0.354306343            | 0.001322264   | 0.000266199         |
| d_Bacteria | p_Bacteroidota       | c_Bacteroidia         | o_Sphingobacteriales                  | f_Lentimicrobiaceae                   | g_Lentimicrobium                  | 0.001038073                           | 0.005886839       | 0.222866145      | 0.015284355            | 0.00182439    | 0.000421482         |
| d_Archaea  | p_Halobacterota      | c_Methanosarcinia     | o_Methanosarciniales                  | f_Methanosarcinaceae                  | g_Methanomethylvoirans            | 9.16E-05                              | 0                 | 0                | 0                      | 0.222073444   | 0.041260898         |
| d_Archaea  | p_Euryarchaeota      | c_Methanobacteria     | o_Methanobacteriales                  | f_Methanobacteriaceae                 | g_Methanobacterium                | 0.160412787                           | 0.193107769       | 0.00011253       | 0                      | 0             | 0                   |
| d_Archaea  | p_Euryarchaeota      | c_Methanobacteria     | o_Methanobacteriales                  | f_Methanobacteriaceae                 | g_Methanobacterium                | 0.1367203                             | 0.157539683       | 0.003469682      | 0.002742745            | 0.000435176   | 0.000221833         |
| d_Bacteria | p_Firmicutes         | c_Clostridia          | o_Peptostreptococcales-Tissierellales | f_Dethiosulfatibacteraceae            | g_Dethiosulfatibacter             | 0.155069765                           | 0.022911445       | 0                | 0                      | 0             | 0                   |
| d_Archaea  | p_Halobacterota      | c_Methanosarcinia     | o_Methanosarciniales                  | f_Methanosarcinaceae                  | g_Methanosarcina                  | 0                                     | 0                 | 0.131229018      | 0.150171129            | 0.001807652   | 0.000465849         |
| d_Bacteria | p_Proteobacteria     | c_Gammaproteobacteria | o_Burkholderiales                     | f_Rhodocyclaceae                      | g_uncultured                      | 0.001343388                           | 0.123830409       | 0.000262571      | 0.000328192            | 0.001138152   | 0.000532399         |
| d_Bacteria | p_Bacteroidota       | c_Bacteroidia         | o_Bacteroidales                       | f_Williamwhitmaniaceae                | g_Blvii28_wastewater-sludge_group | 0                                     | 0.000146199       | 0.05570247       | 0.008532983            | 0.121564624   | 0.004347923         |
| d_Bacteria | p_Firmicutes         | c_uncultured          | o_uncultured                          | f_uncultured                          | g_uncultured                      | 0.116783195                           | 0.012949039       | 0.015116563      | 0.007431197            | 0.005958558   | 0                   |
| d_Bacteria | p_Bacteroidota       | c_Bacteroidia         | o_Bacteroidales                       | f_Rikenellaceae                       | g_uncultured                      | 0.112600372                           | 0.04235589        | 0                | 9.38E-05               | 0             | 0                   |
| d_Bacteria | p_Spirochaetota      | c_Spirochaetia        | o_Spirochaetales                      | f_Spirochaetaceae                     | g_uncultured                      | 0.000305316                           | 0.000626566       | 0.066336578      | 0.069224999            | 0.107237305   | 0.063577275         |
| d_Bacteria | p_Firmicutes         | c_Clostridia          | o_Clostridiales                       | f_Clostridiaceae                      | g_Clostridium_sensu_stricto_16    | 0.102311239                           | 0.002694236       | 0                | 0                      | 5.02E-05      | 0                   |
| d_Bacteria | p_Cloacimonadota     | c_Cloacimonadia       | o_Cloacimonadales                     | f_Cloacimonadaceae                    | g_Candidatus_Cloacimonas          | 0                                     | 0                 | 0                | 0                      | 0.099270244   | 0.057476874         |
| d_Bacteria | p_Firmicutes         | c_Clostridia          | o_Eubacteriales                       | f_Eubacteriaceae                      | g_Acetobacterium                  | 0.000854884                           | 0.001086048       | 0.000300081      | 0                      | 0.000251063   | 0.0001331           |
| d_Bacteria | p_Bacteroidota       | c_Bacteroidia         | o_Bacteroidales                       | f_ML635J-40_aquatic_group             | g_ML635J-40_aquatic_group         | 0                                     | 0                 | 0.081978282      | 0.056495851            | 0.001472902   | 0                   |
| d_Bacteria | p_Synergistota       | c_Synergistia         | o_Synergistales                       | f_Synergistaceae                      | g_Syner-01                        | 0.081213935                           | 0.013011696       | 0.04624993       | 0.049134981            | 0             | 0                   |
| d_Bacteria | p_Desulfobacterota   | c_Desulfobivriota     | o_Desulfobivriales                    | f_Desulfobivriaceae                   | g_Desulfobivrio                   | 0.00314475                            | 0.013784461       | 0.004407434      | 0.048525482            | 0.078432029   | 0.007675414         |
| d_Bacteria | p_Bacteroidota       | c_Bacteroidia         | o_Bacteroidales                       | f_Paludibacteraceae                   | g_uncultured                      | 0.077489085                           | 0.001023392       | 0                | 0                      | 0             | 0                   |
| d_Bacteria | p_Cloacimonadota     | c_Cloacimonadia       | o_Cloacimonadales                     | f_Cloacimonadaceae                    | g_LNR_A2-18                       | 0                                     | 0                 | 0                | 0                      | 0             | 0                   |
| d_Bacteria | p_Chloroflexi        | c_Anaerolineae        | o_Anaerolineales                      | f_Anaerolineaceae                     | g_uncultured                      | 0                                     | 0                 | 0                | 0.002391111            | 0.000719713   | 0.001242264         |
| d_Bacteria | p_Cloacimonadota     | c_Cloacimonadia       | o_Cloacimonadales                     | f_Cloacimonadaceae                    | g_W5                              | 0                                     | 0                 | 0                | 0                      | 0.06423861    | 0.047472215         |
| d_Bacteria | p_Bacteroidota       | c_Bacteroidia         | o_Bacteroidales                       | f_Rikenellaceae                       | g_DMER64                          | 0                                     | 0                 | 0.000168795      | 7.03E-05               | 0             | 0                   |
| d_Bacteria | p_Bacteroidota       | c_Bacteroidia         | o_Bacteroidales                       | f_Dysgonomonadaceae                   | g_Petrimonas                      | 0.000244252                           | 0.000355054       | 0.062041674      | 0.014323222            | 0.00222609    | 0.002218328         |
| d_Bacteria | p_Firmicutes         | c_Clostridia          | o_Clostridia                          | f_Hungateiclostridiaceae              | g_uncultured                      | 0                                     | 0                 | 0.058384441      | 0.006001219            | 0             | 0                   |
| d_Bacteria | p_Proteobacteria     | c_Gammaproteobacteria | o_Enterobacteriales                   | f_Enterobacteriaceae                  | g_uncultured                      | 0                                     | 0                 | 0.014910257      | 0.05462047             | 0.00020085    | 0                   |
| d_Bacteria | p_Armatimonadota     | c_uncultured          | o_uncultured                          | f_uncultured                          | g_uncultured                      | 0                                     | 0                 | 0                | 0                      | 0.00169049    | 0.000798598         |
| d_Bacteria | p_Synergistota       | c_Synergistia         | o_Synergistales                       | f_Synergistaceae                      | g_JGI-0000079-D21                 | 0                                     | 0                 | 0                | 0                      | 0.053175108   | 0.01752479          |
| d_Bacteria | p_Synergistota       | c_Synergistia         | o_Synergistales                       | f_Synergistaceae                      | g_uncultured                      | 0                                     | 0                 | 0                | 7.03E-05               | 0.000351488   | 0.000465849         |
| d_Bacteria | p_Desulfobacterota   | c_Desulfobivriota     | o_Desulfobivriales                    | f_Desulfomicrobiaceae                 | g_Desulfomicrobium                | 0                                     | 0.000167084       | 0                | 0                      | 0.010327051   | 0.04831518          |
| d_Bacteria | p_Bacteroidota       | c_Bacteroidia         | o_Bacteroidales                       | f_Dysgonomonadaceae                   | g_Proteiniphilum                  | 0                                     | 0.000856307       | 0.042949043      | 0.006938909            | 0.000318013   | 0.015949777         |
| d_Bacteria | p_Bacteroidota       | c_Bacteroidia         | o_Bacteroidales                       | f_Rikenellaceae                       | g_U29-B03                         | 0                                     | 0                 | 0                | 0                      | 0             | 0                   |
| d_Bacteria | p_Bacteroidota       | c_Bacteroidia         | o_Bacteroidales                       | f_Rikenellaceae                       | g_S50_wastewater-sludge_group     | 0                                     | 0                 | 0                | 0                      | 0.043919258   | 0.00270636          |
| d_Bacteria | p_Synergistota       | c_Synergistia         | o_Synergistales                       | f_Synergistaceae                      | g_Thermovirga                     | 0                                     | 0                 | 0.012603387      | 0.042688359            | 0.000150638   | 0                   |
| d_Bacteria | p_Acidobacteriota    | c_Holophagae          | o_Holophagales                        | f_Holophagaceae                       | g_Holophagaceae                   | 0                                     | 0                 | 0                | 0                      | 0             | 0                   |
| d_Bacteria | p_Firmicutes         | c_Clostridia          | o_Clostridiales                       | f_Clostridiaceae                      | g_Clostridium_sensu_stricto_7     | 0.009251061                           | 0.040580618       | 0.001031527      | 0.001617516            | 0.009506913   | 0.001752479         |
| d_Bacteria | p_Desulfobacterota   | c_Desulfuromonadia    | o_Geobacteriales                      | f_Geobacteriaceae                     | g_Trichlorobacter                 | 0.000671694                           | 0.03855472        | 0                | 0                      | 0.000468651   | 0                   |
| d_Bacteria | p_Bacteroidota       | c_Bacteroidia         | o_Bacteroidales                       | f_Bacteroidetes_vadinHA17             | g_Bacteroidetes_vadinHA17         | 0                                     | 0                 | 0                | 0                      | 0.000184113   | 0                   |
| d_Bacteria | p_Chloroflexi        | c_Anaerolineae        | o_Anaerolineales                      | f_Anaerolineaceae                     | g_uncultured                      | 6.11E-05                              | 0                 | 0                | 0                      | 0             | 0                   |
| d_Bacteria | p_Firmicutes         | c_Syntrophomonadia    | o_Syntrophomonadales                  | f_Syntrophomonadaceae                 | g_uncultured                      | 0                                     | 0                 | 0.000300081      | 7.03E-05               | 0             | 0                   |
| d_Bacteria | p_Cloacimonadota     | c_Cloacimonadia       | o_Cloacimonadales                     | f_W27                                 | g_W27                             | 0                                     | 0                 | 0                | 0                      | 0.037123824   | 0.027174516         |
| d_Bacteria | p_Firmicutes         | c_Incertae_Sedis      | o_DTU014                              | f_DTU014                              | g_DTU014                          | 0                                     | 0                 | 0                | 0                      | 0             | 0.000155283         |
| d_Bacteria | p_Bacteroidota       | c_Bacteroidia         | o_Bacteroidales                       | f_Williamwhitmaniaceae                | g_Acetobacteroides                | 0                                     | 0                 | 0                | 0                      | 0             | 0                   |
| d_Bacteria | p_Synergistota       | c_Synergistia         | o_Synergistales                       | f_Synergistaceae                      | g_Aminobacterium                  | 0                                     | 0                 | 0.003619723      | 0.011697689            | 0.000150638   | 0                   |
| d_Bacteria | p_Firmicutes         | c_Clostridia          | o_Peptostreptococcales-Tissierellales | f_Anaerovoracaceae                    | g_Anaerovorax                     | 0.01590694                            | 0.001670844       | 0.014610176      | 0.00445403             | 0.026512235   | 0.002240511         |
| d_Bacteria | p_Bacteroidota       | c_Bacteroidia         | o_Bacteroidales                       | f_Rikenellaceae                       | g_dgA-11_gut_group                | 0                                     | 0                 | 0                | 0                      | 0             | 0                   |
| d_Bacteria | p_Firmicutes         | c_Clostridia          | o_Eubacteriales                       | f_Eubacteriaceae                      | g_Eubacterium                     | 0                                     | 0                 | 0                | 0                      | 0             | 0                   |
| d_Archaea  | p_Thermoplasmata     | c_Thermoplasmata      | o_Methanomassiliococcales             | f_Methanomassiliococcaceae            | g_Methanomassiliococcus           | 0                                     | 6.27E-05          | 0                | 0                      | 0.020788003   | 0.006899            |
| d_Bacteria | p_Firmicutes         | c_Clostridia          | o_Peptostreptococcales-Tissierellales | f_Sedimentibacteraceae                | g_Sedimentibacter                 | 0.000274784                           | 0.000814536       | 0                | 7.03E-05               | 0.000117163   | 0                   |
| d_Bacteria | p_Bacteroidota       | c_Bacteroidia         | o_Bacteroidales                       | f_Bacteroidaceae                      | g_Bacteroides                     | 0                                     | 0                 | 0                | 0                      | 0             | 0                   |
| d_Bacteria | p_Bacteroidota       | c_Bacteroidia         | o_Sphingobacteriales                  | f_Lentimicrobiaceae                   | g_Lentimicrobiaceae               | 0                                     | 0                 | 0                | 0                      | 0             | 0                   |
| d_Bacteria | p_Chloroflexi        | c_Anaerolineae        | o_Anaerolineales                      | f_Anaerolineaceae                     | g_Longilinea                      | 0                                     | 0                 | 0                | 0                      | 0             | 0.000110916         |
| d_Bacteria | p_Synergistota       | c_Synergistia         | o_Synergistales                       | f_Synergistaceae                      | g_Lactivibrio                     | 0                                     | 0                 | 0                | 0                      | 0.003933318   | 0.002240511         |
| d_Bacteria | p_Firmicutes         | c_Clostridia          | o_Christensenellales                  | f_Christensenellaceae                 | g_Christensenellaceae_R-7_group   | 0                                     | 0.001524645       | 0.006376714      | 0.006704487            | 0.007799685   | 0.000465849         |
| d_Bacteria | p_Firmicutes         | c_Clostridia          | o_Clostridia                          | f_Gracilibacteraceae                  | g_Gracilibacter                   | 0                                     | 0                 | 0                | 0                      | 0             | 0                   |
| d_Bacteria | p_Firmicutes         | c_Clostridia          | o_Peptostreptococcales-Tissierellales | f_Peptostreptococcales-Tissierellales | g_Soehngenia                      | 0.003633255                           | 0.01566416        | 0.005026351      | 0.002156688            | 0             | 0                   |
| d_Archaea  | p_Halobacterota      | c_Methanosarcinia     | o_Methanosarciniales                  | f_Methanosarcinaceae                  | g_Methanosarcina                  | 0                                     | 0                 | 0                | 0                      | 0             | 0.000155283         |
| d_Bacteria | p_Patescibacteria    | c_Dojkabacteria       | o_Dojkabacteria                       | f_Dojkabacteria                       | g_Dojkabacteria                   | 0                                     | 0                 | 0                | 0                      | 0             | 0                   |
| d_Bacteria | p_Proteobacteria     | c_Gammaproteobacteria | o_Pseudomonadales                     | f_Pseudomonadaceae                    | g_Pseudomonas                     | 0.000366379                           | 0.000396825       | 0                | 0.000398518            | 0             | 0                   |
| d_Bacteria | p_Bacteroidota       | c_Bacteroidia         | o_Bacteroidales                       | f_Dysgonomonadaceae                   | g_uncultured                      | 0                                     | 0                 | 0                | 0                      | 0             | 0                   |
| d_Bacteria | p_Firmicutes         | c_Bacilli             | o_Erysipelotrichales                  | f_Erysipelatoclostridiaceae           | g_UCG-004                         | 0                                     | 0                 | 0                | 0                      | 0             | 0                   |
| d_Archaea  | p_Thermoplasmata     | c_Thermoplasmata      | o_Methanomassiliococcales             | f_Methanomethylphilaceae              | g_Candidatus_Methanogramnum       | 0                                     | 4.18E-05          | 0                | 0                      | 0             | 0                   |
| d_Bacteria | p_Bacteroidota       | c_Bacteroidia         | o_Bacteroidales                       | f_Prolixibacteraceae                  | g_uncultured                      | 0                                     | 0                 | 0                | 0                      | 0             | 0                   |
| d_Bacteria | p_Actinobacteriota   | c_Coriobacteria       | o.OPB41                               | f.OPB41                               | g.OPB41                           | 0.000122126                           | 0                 | 0.002888276      | 0.01399503             | 8.37E-05      | 0                   |
| d_Bacteria | p_Caldatribacteriota | c_Caldatribacteriia   | o_Caldatribacteriales                 | f_Caldatribacteriaceae                | g_Candidatus_Caldatribacterium    | 0                                     | 0                 | 0.00018755       | 0                      | 0.000251063   | 0.000244016         |
| d_Bacteria | p_Firmicutes         | c_Desulfibacteriia    | o_Desulfibacteriales                  | f_uncultured                          | g_uncultured                      | 0.003633255                           | 0.012719298       | 0.000918997      | 0.005063529            | 0             | 0                   |
| d_Bacteria | p_Firmicutes         | c_Clostridia          | o_Peptococcales                       | f_Peptococcaceae                      | g_uncultured                      | 0.000305316                           | 0.001086048       | 0.001913014      | 0.011978996            | 0.000602551   | 0                   |
| d_Bacteria | p_Cloacimonadota     | c_Cloacimonadia       | o_Cloacimonadales                     | f_M5BL8                               | g_M5BL8                           | 0                                     | 0                 | 0.001669199      | 0.011721131            | 0             | 0                   |
| d_Bacteria | p_Firmicutes         | c_Clostridia          | o_Peptostreptococcales-Tissierellales | f_Anaerovoracaceae                    | g_uncultured                      | 0                                     | 6.27E-05          | 0.011665635      | 0.002414553            | 0             | 0                   |
| d_Bacteria | p_Bacteroidota       | c_Bacteroidia         | o_Bacteroidales                       | f_uncultured                          | g_uncultured                      | 0                                     | 0                 | 0                | 0                      | 0             | 0                   |
| d_Bacteria | p_Chloroflexi        | c_Anaerolineae        | o_SBR1031                             | f_SBR1031                             | g_SBR1031                         | 0                                     | 0                 | 0                | 0                      | 0.00033475    | 0.00054582          |
| d_Bacteria | p_Acidobacteriota    | c_Subgroup_22         | o_Subgroup_22                         | f_Subgroup_22                         | g_Subgroup_22                     | 0                                     | 0                 | 0                | 0                      | 0             | 0                   |
| d_Bacteria | p_Spirochaetota      | c_Spirochaetia        | o_Spirochaetales                      | f_Spirochaetaceae                     | g_Sphaerochaeta                   | 0                                     | 0                 | 0.010052702      | 0.003797646            | 0.000836876   | 0.000221833         |
| d_Bacteria | p_Bacteroidota       | c_Bacteroidia         | o_Bacteroidales                       | f_009E01-B-SD-P15                     | g_009E01-B-SD-P15                 | 0                                     | 0                 | 0                | 0                      | 0.005037994   | 0.009827192         |

|   |          |   |                   |   |                           |   |                                     |   |                                     |   |                                 |             |             |             |             |             |             |
|---|----------|---|-------------------|---|---------------------------|---|-------------------------------------|---|-------------------------------------|---|---------------------------------|-------------|-------------|-------------|-------------|-------------|-------------|
| d | Bacteria | p | Desulfobacterota  | c | Syntrophia                | o | Syntrophales                        | f | Smithellaceae                       | g | Smithella                       | 0           | 0           | 0           | 0           | 0           | 0           |
| d | Bacteria | p | Nitrospirota      | c | Thermodesulfobionia       | o | uncultured                          | f | uncultured                          | g | uncultured                      | 0           | 0           | 0           | 0           | 0.003464667 | 0.009649726 |
| d | Bacteria | p | Firmicutes        | c | Negativicutes             | o | Veillonellales-Selenomonadales      | f | Selenomonadaceae                    | g | Propionispira                   | 0           | 0           | 0           | 0           | 0           | 0           |
| d | Bacteria | p | Bacteroidia       | c | Bacteroidia               | o | Bacteroidales                       | f | Rikenellaceae                       | g | Bact-08                         | 0           | 0           | 0           | 0           | 0           | 0           |
| d | Bacteria | p | Chloroflexi       | c | Anaerolineae              | o | Anaerolineales                      | f | Anaerolineaceae                     | g | Leptolinea                      | 0           | 0           | 0           | 0           | 0.000786664 | 0.000155283 |
| d | Bacteria | p | Firmicutes        | c | Clostridia                | o | Oscillospirales                     | f | Ruminococcaceae                     | g | Anaerofilum                     | 0           | 0           | 0           | 0           | 0           | 0           |
| d | Bacteria | p | Armatimonadota    | c | Chthonomonadetes          | o | Chthonomonadales                    | f | Chthonomonadales                    | g | Chthonomonadales                | 0           | 0           | 0           | 0           | 0.008569611 | 0.005168704 |
| d | Bacteria | p | Latescibacterota  | c | Latescibacteria           | o | Latescibacterales                   | f | Latescibacteraceae                  | g | Candidatus Latescibacter        | 0           | 0           | 0           | 0           | 0           | 0           |
| d | Bacteria | p | Acidobacteriota   | c | Aminicenantia             | o | Aminicenantales                     | f | Aminicenantales                     | g | Aminicenantales                 | 0           | 0           | 0           | 0           | 0.000485388 | 0.001264447 |
| d | Bacteria | p | Thermotogota      | c | Thermotogae               | o | Petrotogales                        | f | Petrotogaceae                       | g | AUTHM297                        | 0           | 0           | 0           | 0           | 0.000368225 | 0.001685929 |
| d | Bacteria | p | Desulfobacterota  | c | Syntrophia                | o | Syntrophales                        | f | Syntrophaceae                       | g | Syntrophus                      | 0           | 0           | 0           | 0           | 0.0001339   | 0           |
| d | Bacteria | p | Firmicutes        | c | Thermoanaerobacteria      | o | Thermoanaerobacterales              | f | SRB2                                | g | SRB2                            | 0.005404085 | 0.007790309 | 0           | 0           | 0           | 0           |
| d | Bacteria | p | Thermotogota      | c | Thermotogae               | o | Kosmotogales                        | f | Kosmotogaceae                       | g | Mesotoga                        | 0           | 0           | 0.005926593 | 0.007759389 | 0.000719713 | 0.000288383 |
| d | Bacteria | p | Desulfobacterota  | c | Syntrophia                | o | Syntrophales                        | f | uncultured                          | g | uncultured                      | 0           | 0           | 0           | 0           | 0.000150638 | 0.000643315 |
| d | Bacteria | p | Firmicutes        | c | Desulfobacteriia          | o | Desulfobacteriales                  | f | Desulfobacteriales                  | g | Candidatus_Dichloromethanomonas | 0           | 0           | 0.001369118 | 0.007571851 | 0           | 0           |
| d | Bacteria | p | Proteobacteria    | c | Gammaproteobacteria       | o | Aeromonadales                       | f | Aeromonadaceae                      | g | Aeromonas                       | 0           | 0           | 0           | 0           | 0           | 0           |
| d | Bacteria | p | Firmicutes        | c | Negativicutes             | o | Veillonellales-Selenomonadales      | f | Sporomusaceae                       | g | uncultured                      | 0           | 0           | 0           | 0           | 0.007247347 | 0.001663746 |
| d | Bacteria | p | Caldiseriata      | c | Caldiseriata              | o | Caldisericales                      | f | WCHB1-02                            | g | WCHB1-02                        | 0           | 0           | 0           | 0           | 0           | 0           |
| d | Bacteria | p | Firmicutes        | c | Syntrophomonadia          | o | Syntrophomonadales                  | f | Syntrophomonadaceae                 | g | Syntrophomonas                  | 0           | 0           | 0           | 0           | 0.001154889 | 8.87E-05    |
| d | Bacteria | p | Firmicutes        | c | Negativicutes             | o | Acidaminococcales                   | f | Acidaminococcaceae                  | g | Acidaminococcus                 | 0           | 0           | 0           | 0           | 0           | 0           |
| d | Bacteria | p | Firmicutes        | c | Clostridia                | o | Oscillospirales                     | f | Oscillospiraceae                    | g | Oscilibacter                    | 0           | 0           | 0           | 0           | 0           | 0           |
| d | Bacteria | p | Synergistota      | c | Synergistia               | o | Synergistales                       | f | Synergistaceae                      | g | EBM-39                          | 0           | 0           | 0           | 0           | 0           | 0           |
| d | Archaea  | p | Halobacterota     | c | Methanomicrobia           | o | Methanomicrobiales                  | f | Methanoregulaceae                   | g | Methanoregula                   | 0           | 0           | 0           | 0           | 0           | 0           |
| d | Bacteria | p | Verrucomicrobiota | c | Lentisphaeria             | o | Victivallales                       | f | GW2-44-16                           | g | GW2-44-16                       | 0           | 0           | 0           | 0           | 0           | 0           |
| d | Bacteria | p | Firmicutes        | c | Clostridia                | o | Oscillospirales                     | f | Oscillospiraceae                    | g | NK4A214_group                   | 0           | 0           | 0           | 0           | 0           | 0           |
| d | Bacteria | p | Cloacimonadota    | c | Cloacimonadia             | o | Cloacimonadales                     | f | PBS-18                              | g | PBS-18                          | 0           | 0           | 0           | 0           | 0           | 4.44E-05    |
| d | Bacteria | p | Desulfobacterota  | c | Desulfobionia             | o | Desulfobioniales                    | f | Desulfobionaceae                    | g | Desulfocurvus                   | 0           | 0           | 0.001012772 | 0.005086971 | 0           | 0           |
| d | Bacteria | p | Cloacimonadota    | c | Cloacimonadia             | o | Cloacimonadales                     | f | uncultured                          | g | uncultured                      | 0           | 0           | 0           | 0           | 0           | 0           |
| d | Bacteria | p | Chloroflexi       | c | Anaerolineae              | o | RBG-13-54-9                         | f | RBG-13-54-9                         | g | RBG-13-54-9                     | 0           | 0           | 0           | 0           | 0           | 0           |
| d | Bacteria | p | WPS-2             | c | WPS-2                     | o | WPS-2                               | f | WPS-2                               | g | WPS-2                           | 0           | 0           | 0.000543024 | 0           | 0           | 0           |
| d | Bacteria | p | Bacteroidia       | c | Bacteroidia               | o | Bacteroidales                       | f | Muribaculaceae                      | g | Muribaculaceae                  | 0           | 0           | 0           | 0           | 0           | 0           |
| d | Bacteria | p | Firmicutes        | c | Negativicutes             | o | Veillonellales-Selenomonadales      | f | Sporomusaceae                       | g | Pelosinus                       | 0           | 0           | 0.000856307 | 0           | 0           | 0           |
| d | Bacteria | p | Desulfobacterota  | c | Syntrophorhabdia          | o | Syntrophorhabdiales                 | f | Syntrophorhabdaceae                 | g | Syntrophorhabdus                | 0           | 0           | 0           | 0           | 0.0002678   | 0.000931698 |
| d | Bacteria | p | Proteobacteria    | c | Gammaproteobacteria       | o | Pseudomonadales                     | f | Moraxellaceae                       | g | Acinetobacter                   | 0           | 0           | 0           | 0           | 0           | 0           |
| d | Archaea  | p | Halobacterota     | c | Methanomicrobia           | o | Methanomicrobiales                  | f | Methanoregulaceae                   | g | Methanolinea                    | 0           | 0           | 0           | 0           | 0           | 0           |
| d | Bacteria | p | Actinobacteriota  | c | Actinobacteria            | o | Corynebacteriales                   | f | Mycobacteriaceae                    | g | Mycobacterium                   | 0           | 0           | 0           | 0           | 0           | 0           |
| d | Bacteria | p | Hydrogenedentes   | c | Hydrogenedentia           | o | Hydrogenedentiales                  | f | Hydrogenedentaceae                  | g | YC-Z55-LKJ63                    | 0           | 0           | 0           | 0           | 0           | 0           |
| d | Bacteria | p | Firmicutes        | c | Negativicutes             | o | Acidaminococcales                   | f | Acidaminococcaceae                  | g | uncultured                      | 0           | 0           | 0           | 0           | 0           | 0           |
| d | Bacteria | p | Actinobacteriota  | c | WCHB1-81                  | o | WCHB1-81                            | f | WCHB1-81                            | g | WCHB1-81                        | 9.38E-05    | 0.000140654 | 0.00020085  | 0.000354932 | 0           | 0           |
| d | Bacteria | p | Chloroflexi       | c | Anaerolineae              | o | Anaerolineales                      | f | Anaerolineaceae                     | g | Flexilinea                      | 0           | 0           | 0           | 0           | 6.70E-05    | 0           |
| d | Archaea  | p | Euryarchaeota     | c | Methanobacteria           | o | Methanobacteriales                  | f | Methanobacteriaceae                 | g | Methanosphaera                  | 0           | 0           | 0           | 0           | 0           | 0           |
| d | Bacteria | p | Patescibacteria   | c | Microgenomata             | o | Candidatus_Woesebacteria            | f | Candidatus_Woesebacteria            | g | Candidatus_Woesebacteria        | 0           | 0           | 0           | 0           | 0           | 0           |
| d | Bacteria | p | Bacteroidia       | c | Kapabacteria              | o | Kapabacteriales                     | f | Kapabacteriales                     | g | Kapabacteriales                 | 0           | 0           | 0           | 0           | 0.000301275 | 0           |
| d | Bacteria | p | Desulfobacterota  | c | Syntrophobacteria         | o | Syntrophobacteriales                | f | Syntrophobacteraceae                | g | Syntrophobacter                 | 0           | 0           | 0           | 0           | 0           | 0.000266199 |
| d | Archaea  | p | Euryarchaeota     | c | Methanobacteria           | o | Methanobacteriales                  | f | Methanobacteriaceae                 | g | Methanobrevibacter              | 0           | 0           | 0           | 0           | 0           | 0           |
| d | Bacteria | p | Caldiseriata      | c | Caldiseriata              | o | Caldisericales                      | f | LF045                               | g | LF045                           | 0           | 0           | 0           | 0           | 0           | 0           |
| d | Bacteria | p | Firmicutes        | c | Desulfotomaculia          | o | Desulfotomaculales                  | f | Desulfotomaculales                  | g | Pelotomaculum                   | 0           | 0           | 0           | 0           | 0           | 0           |
| d | Bacteria | p | Actinobacteriota  | c | Actinobacteria            | o | Micrococcales                       | f | Microbacteriaceae                   | g | Galbitalea                      | 0           | 0           | 0           | 0           | 0           | 0           |
| d | Bacteria | p | Chloroflexi       | c | Anaerolineae              | o | Anaerolineales                      | f | Anaerolineaceae                     | g | Anaerolineaceae                 | 0           | 0           | 0           | 0           | 0           | 0           |
| d | Bacteria | p | Firmicutes        | c | Clostridia                | o | Eubacteriales                       | f | Anaerofustaceae                     | g | Anaerofustis                    | 0           | 0           | 0           | 0           | 0.003079704 | 0.000421482 |
| d | Bacteria | p | Bacteroidia       | c | SJA-28                    | o | SJA-28                              | f | SJA-28                              | g | SJA-28                          | 0           | 0           | 0           | 0           | 0.001924815 | 6.65E-05    |
| d | Bacteria | p | SAR324_clade(Mar  | c | SAR324_clade(Marine_group | o | SAR324_clade(Marine_group_B)        | f | SAR324_clade(Marine_group_B)        | g | SAR324_clade(Marine_group_B)    | 0           | 0           | 0           | 0           | 0           | 0           |
| d | Bacteria | p | Synergistota      | c | Synergistia               | o | Synergistales                       | f | Synergistaceae                      | g | uncultured                      | 0.002869966 | 0.001315789 | 0           | 0           | 0           | 0           |
| d | Bacteria | p | Actinobacteriota  | c | Thermoleophilina          | o | Gaiellales                          | f | uncultured                          | g | uncultured                      | 0           | 0           | 0           | 0           | 0           | 0           |
| d | Bacteria | p | Firmicutes        | c | Clostridia                | o | Clostridia                          | f | Hungateiclostridiaceae              | g | Ruminiclostridium               | 0           | 0           | 0.000125313 | 0           | 0           | 0           |
| d | Bacteria | p | Chloroflexi       | c | Anaerolineae              | o | Anaerolineales                      | f | Anaerolineaceae                     | g | Pelolinea                       | 0           | 0           | 0           | 0           | 0.002644529 | 0.001020431 |
| d | Bacteria | p | Firmicutes        | c | Clostridia                | o | Clostridiales                       | f | Clostridiaceae                      | g | Proteiniclasticum               | 0.000366379 | 0.000355054 | 0           | 0           | 0.000351488 | 0           |
| d | Bacteria | p | Firmicutes        | c | Clostridia                | o | Peptostreptococcales-Tissierellales | f | Peptostreptococcaceae               | g | Romboutsia                      | 0           | 0           | 0           | 0           | 0           | 0           |
| d | Bacteria | p | Acidobacteriota   | c | Acidobacteriata           | o | uncultured                          | f | uncultured                          | g | uncultured                      | 0           | 0           | 0           | 0           | 0           | 0           |
| d | Bacteria | p | Firmicutes        | c | Syntrophomonadia          | o | Syntrophomonadales                  | f | Syntrophomonadaceae                 | g | uncultured                      | 0           | 0           | 0.000525141 | 0.000117211 | 0.00162354  | 0.000155283 |
| d | Bacteria | p | Firmicutes        | c | Clostridia                | o | Oscillospirales                     | f | Oscillospiraceae                    | g | uncultured                      | 0           | 0           | 0           | 0           | 0           | 0           |
| d | Bacteria | p | Firmicutes        | c | Clostridia                | o | Christensenellales                  | f | Christensenellaceae                 | g | uncultured                      | 0           | 0           | 0           | 0           | 0           | 0.000110916 |
| d | Bacteria | p | Verrucomicrobiota | c | Verrucomicrobia           | o | Pedospaerales                       | f | Pedospaeraceae                      | g | ADurb_Bin063-1                  | 0           | 0           | 0           | 0           | 0           | 0           |
| d | Bacteria | p | Bacteroidia       | c | Bacteroidia               | o | Bacteroidales                       | f | Prolixibacteraceae                  | g | Meniscus                        | 0           | 0           | 0           | 0           | 0           | 0           |
| d | Bacteria | p | Zixibacteria      | c | Zixibacteria              | o | Zixibacteria                        | f | Zixibacteria                        | g | Zixibacteria                    | 0           | 0           | 0           | 0           | 0           | 0           |
| d | Bacteria | p | Firmicutes        | c | Clostridia                | o | Oscillospirales                     | f | Oscillospiraceae                    | g | Intestinomonas                  | 0           | 0.00234438  | 0.001218998 | 0           | 0           | 0.0001331   |
| d | Bacteria | p | Firmicutes        | c | Clostridia                | o | Clostridia UCG-014                  | f | Clostridia UCG-014                  | g | Clostridia UCG-014              | 0           | 0           | 0           | 0           | 0           | 0           |
| d | Bacteria | p | Proteobacteria    | c | Alphaproteobacteria       | o | Rhizobiales                         | f | Hyphomicrobiaceae                   | g | Hyphomicrobium                  | 0           | 0           | 0           | 0           | 0           | 0           |
| d | Bacteria | p | Firmicutes        | c | Clostridia                | o | Peptostreptococcales-Tissierellales | f | Peptostreptococcales-Tissierellales | g | uncultured                      | 0           | 0.00223185  | 0.000609499 | 0           | 0           | 0           |
| d | Bacteria | p | Firmicutes        | c | Negativicutes             | o | Veillonellales-Selenomonadales      | f | Sporomusaceae                       | g | Anaeromusa-Anaeromarcus         | 0           | 0           | 0           | 0           | 0           | 0           |
| d | Bacteria | p | Firmicutes        | c | Clostridia                | o | Lachnospirales                      | f | Lachnospiraceae                     | g | Anaerostignum                   | 0           | 0.002192982 | 0           | 0.000843921 | 0.000117163 | 4.44E-05    |
| d | Bacteria | p | Proteobacteria    | c | Alphaproteobacteria       | o | Rhizobiales                         | f | Rhizobiales Incertae Sedis          | g | uncultured                      | 0           | 0           | 0           | 0           | 0           | 0           |
| d | Bacteria | p | Verrucomicrobiota | c | Verrucomicrobia           | o | Pedospaerales                       | f | Pedospaeraceae                      | g | Pedospaeraceae                  | 0           | 0           | 0           | 0           | 0           | 0           |
| d | Bacteria | p | Spirochaetota     | c | Brachyspirae              | o | Brachyspirales                      | f | Brachyspirales Incertae Sedis       | g | Exilispira                      | 0           | 0           | 0           | 0           | 0           | 0           |
| d | Bacteria | p | Bacteroidia       | c | Bacteroidia               | o | Bacteroidales                       | f | Rikenellaceae                       | g | Alistipes                       | 0           | 0.000206305 | 0.002133246 | 0           | 0           | 0.0001331   |
| d | Bacteria | p | Campylobacterota  | c | Campylobacteria           | o | Campylobacteriales                  | f | Arcobacteraceae                     | g | Pseudarcobacter                 | 0           | 0           | 0           | 0           | 0           | 0           |
| d | Bacteria | p | Fermentibacterota | c | Fermentibacteria          | o | Fermentibacterales                  | f | Fermentibacteraceae                 | g | Fermentibacteraceae             | 0           | 0           | 0           | 0           | 0           | 0           |
| d | Bacteria | p | Thermotogota      | c | Thermotogae               | o | Petrotogales                        | f | Petrotogaceae                       | g | SC103                           | 0           | 0           | 0           | 0           | 0           | 0           |
| d | Bacteria | p | Bacteroidia       | c | Bacteroidia               | o | Bacteroidales                       | f | Dysgonomonadaceae                   | g | Fermentimonas                   | 0           | 0           | 9.38E-05    | 0           | 0           | 0           |

|            |                     |                       |                                       |                                         |                                         |             |             |             |             |             |             |
|------------|---------------------|-----------------------|---------------------------------------|-----------------------------------------|-----------------------------------------|-------------|-------------|-------------|-------------|-------------|-------------|
| d_Bacteria | p_Acidobacteriota   | c_c5LKS83             | o_c5LKS83                             | f_c5LKS83                               | g_c5LKS83                               | 0           | 0           | 0           | 0           | 0           | 0           |
| d_Bacteria | p_Chloroflexi       | c_Anaerolineae        | o_Adurb.Bin180                        | f_Adurb.Bin180                          | g_Adurb.Bin180                          | 0           | 0           | 0           | 0           | 0           | 0           |
| d_Bacteria | p_Firmicutes        | c_Clostridia          | o_Oscillospirales                     | f_Ruminococcaceae                       | g_Candidatus_Soleaeferrea               | 0           | 0           | 0           | 0           | 0           | 0           |
| d_Archaea  | p_Halobacterota     | c_Methanomicrobia     | o_Methanomicrobiales                  | f_Methanomicrobiaceae                   | g_Methanococcus                         | 0           | 0           | 0.001650444 | 0.000351634 | 0           | 0           |
| d_Bacteria | p_Elusimicrobiota   | c_Endomicrobia        | o_Endomicrobiales                     | f_Endomicrobiaceae                      | g_Endomicrobium                         | 0.00037594  | 0           | 0           | 0           | 0.001238577 | 0.000510215 |
| d_Bacteria | p_Chloroflexi       | c_Anaerolineae        | o_Anaerolineales                      | f_Anaerolineaceae                       | g_Bellilinea                            | 0           | 0           | 0           | 0           | 0           | 0           |
| d_Bacteria | p_Firmicutes        | c_D8A-2               | o_D8A-2                               | f_D8A-2                                 | g_D8A-2                                 | 0           | 0           | 0           | 0           | 0           | 0           |
| d_Bacteria | p_Firmicutes        | c_Clostridia          | o_Clostridia                          | f_Hungateiclostridiaceae                | g_HN-HF0106                             | 0           | 0           | 0           | 0.000117211 | 0           | 0           |
| d_Bacteria | p_Synergistota      | c_Synergistia         | o_Synergistales                       | f_Synergistaceae                        | g_Aminomonas                            | 0           | 0           | 0           | 0           | 0           | 0           |
| d_Bacteria | p_Plantomycetota    | c_Plantomycetes       | o_Pirellulales                        | f_Pirellulaceae                         | g_uncultured                            | 0           | 0           | 0           | 0           | 0           | 0           |
| d_Bacteria | p_Proteobacteria    | c_Alphaproteobacteria | o_Rhodobacterales                     | f_Rhodobacteraceae                      | g_Rhodobacter                           | 0           | 0           | 0           | 0           | 0           | 0           |
| d_Bacteria | p_Firmicutes        | c_Clostridia          | o_Clostridiales                       | f_Clostridiaceae                        | g_Clostridium_sensu_stricto_1           | 0           | 0           | 0           | 0           | 0           | 0           |
| d_Bacteria | p_Calditrichota     | c_Calditrichia        | o_Calditrichales                      | f_Calditrichaceae                       | g_Calditrichaceae                       | 0           | 0           | 0           | 0           | 0           | 0           |
| d_Bacteria | p_Bacteroidota      | c_Ignavibacteria      | o_Ignavibacteriales                   | f_BSV40                                 | g_BSV40                                 | 0           | 0           | 0           | 0           | 0           | 0           |
| d_Bacteria | p_Patescibacteria   | c_Berkelbacteria      | o_Berkelbacteria                      | f_Berkelbacteria                        | g_Berkelbacteria                        | 0           | 0           | 0           | 0           | 0           | 0           |
| d_Bacteria | p_Firmicutes        |                       |                                       |                                         |                                         | 0.00137392  | 0           | 0           | 0           | 0           | 0           |
| d_Bacteria | p_Actinobacteriota  | c_Actinobacteria      | o_Micrococcales                       | f_Intrasporangiaceae                    | g_Ornithinibacter                       | 0           | 0           | 0           | 0           | 0           | 0           |
| d_Bacteria | p_Proteobacteria    | c_Gammaproteobacteria | o_Burkholderiales                     | f_Comamonadaceae                        | g_Acidovorax                            | 0           | 0           | 0           | 0           | 0           | 0           |
| d_Bacteria | p_Spirochaetota     | c_V2072-189E03        | o_V2072-189E03                        | f_V2072-189E03                          | g_V2072-189E03                          | 0           | 0           | 0           | 0           | 0           | 0           |
| d_Bacteria | p_Hydrogenedentes   | c_Hydrogenedentia     | o_Hydrogenedentiales                  | f_Hydrogenedensaceae                    | g_Hydrogenedensaceae                    | 0           | 0.000206305 | 0           | 0           | 0           | 0           |
| d_Bacteria | p_Chloroflexi       | c_Anaerolineae        | o_uncultured                          | f_uncultured                            | g_uncultured                            | 0           | 0           | 0           | 0           | 0           | 0           |
| d_Bacteria |                     |                       |                                       |                                         |                                         | 0.000213721 | 8.35E-05    | 0           | 0           | 0.001322264 | 0.000754231 |
| d_Bacteria | p_Firmicutes        | c_Clostridia          | o_Clostridia_vadinBB60_group          | f_Clostridia_vadinBB60_group            | g_Clostridia_vadinBB60_group            | 0           | 0           | 0           | 0           | 0           | 0           |
| d_Bacteria | p_Patescibacteria   |                       |                                       |                                         |                                         | 0           | 0           | 0           | 0           | 0           | 0           |
| d_Bacteria | p_Proteobacteria    | c_Alphaproteobacteria | o_Sphingomonadales                    | f_Sphingomonadaceae                     | g_uncultured                            | 0           | 0           | 0           | 0           | 0           | 0           |
| d_Bacteria | p_Thermotogota      | c_Thermotogae         | o_Thermotogales                       | f_Fervidobacteriaceae                   | g_Fervidobacterium                      | 0           | 0           | 0           | 0           | 0           | 0.000399299 |
| d_Bacteria | p_uncultured        | c_uncultured          | o_uncultured                          | f_uncultured                            | g_uncultured                            | 0           | 0           | 0           | 0           | 0           | 0           |
| d_Bacteria | p_Bacteroidota      | c_Bacteroidia         | o_Flavobacteriales                    | f_Flavobacteriaceae                     | g_Flavobacterium                        | 0           | 0           | 0           | 0           | 0           | 0           |
| d_Bacteria | p_Spirochaetota     | c_Leptospirae         | o_Leptospirales                       | f_Leptospiraceae                        | g_RBG-16-49-21                          | 0           | 0           | 0           | 0           | 0           | 0           |
| d_Bacteria | p_Proteobacteria    | c_Gammaproteobacteria | o_Burkholderiales                     | f_Comamonadaceae                        | g_Comamonadaceae                        | 0           | 0           | 0           | 0           | 0           | 0           |
| d_Bacteria | p_Latescibacterota  | c_Latescibacterota    | o_Latescibacterota                    | f_Latescibacterota                      | g_Latescibacterota                      | 0           | 0           | 0           | 0           | 0           | 0           |
| d_Bacteria | p_Patescibacteria   | c_WWE3                | o_WWE3                                | f_WWE3                                  | g_WWE3                                  | 0           | 0           | 0           | 0           | 0           | 0           |
| d_Bacteria | p_Proteobacteria    | c_Alphaproteobacteria | o_Rhizobiales                         | f_Xanthobacteraceae                     | g_Xanthobacteraceae                     | 0           | 0           | 0           | 0           | 0           | 0           |
| d_Bacteria | p_Firmicutes        | c_Clostridia          | o_Peptostreptococcales-Tissierellales | f_Anaerovoracaceae                      | g_[Eubacterium]_brachy_group            | 0           | 0           | 0           | 0           | 0.000251063 | 0.000110916 |
| d_Bacteria | p_Proteobacteria    | c_Alphaproteobacteria | o_Rhodobacterales                     | f_Rhodobacteraceae                      | g_Thioclava                             | 0           | 0           | 0           | 0           | 0           | 0           |
| d_Bacteria | p_Bacteroidota      | c_Bacteroidia         | o_Bacteroidales                       | f_Tannerellaceae                        | g_Macellibacteroides                    | 0           | 8.35E-05    | 0           | 0           | 0           | 0           |
| d_Bacteria | p_Firmicutes        | c_Clostridia          | o_Clostridia                          | f_Hungateiclostridiaceae                | g_Ercella                               | 0           | 0           | 0.00018755  | 0           | 0           | 0           |
| d_Bacteria | p_Acidobacteriota   | c_Acidobacteriae      | o_TSBb06                              | f_TSBb06                                | g_TSBb06                                | 0           | 0           | 0           | 0           | 0.001121414 | 0           |
| d_Bacteria | p_Bacteroidota      | c_Bacteroidia         | o_Bacteroidales                       | f_Prevotellaceae                        | g_Prevotellaceae_UCG-004                | 0           | 0           | 0           | 0           | 0           | 0           |
| d_Bacteria | p_Plantomycetota    | c_Phycisphaerae       | o_Phycisphaerales                     | f_AKAU3564_sediment_group               | g_AKAU3564_sediment_group               | 0           | 0           | 0           | 0           | 0           | 0           |
| d_Bacteria | p_Firmicutes        | c_Clostridia          | o_Oscillospirales                     | f_Oscillospiraceae                      | g_Oscillospiraceae                      | 0           | 0           | 0           | 0           | 0           | 0           |
| d_Bacteria | p_Proteobacteria    | c_Gammaproteobacteria | o_Burkholderiales                     | f_Burkholderiaceae                      | g_Lautropia                             | 0           | 0           | 0           | 0           | 0           | 0           |
| d_Bacteria | p_Firmicutes        | c_Bacilli             | o_Acholeplasmatales                   | f_Acholeplasmataceae                    | g_Acholeplasma                          | 0           | 0.000271512 | 0           | 0           | 0           | 0           |
| d_Bacteria | p_Desulfobacterota  | c_Syntrophobacteria   | o_Syntrophobacteriales                | f_Syntrophobacteraceae                  | g_Syntrophobacteraceae                  | 0           | 0           | 0           | 0           | 0.001054464 | 0.000421482 |
| d_Bacteria | p_Cloacimonadota    | c_Cloacimonadia       | o_Cloacimonadales                     | f_SHA-4                                 | g_SHA-4                                 | 0           | 0           | 0           | 0           | 0           | 0           |
| d_Bacteria | p_Bacteroidota      | c_Bacteroidia         | o_Bacteroidales                       | f_Rikenellaceae                         | g_Rikenellaceae                         | 0           | 0.001002506 | 0           | 0           | 0           | 0           |
| d_Bacteria | p_Chloroflexi       | c_Anaerolineae        | o_Anaerolineales                      | f_Anaerolineaceae                       | g_Anaerolinea                           | 0           | 0           | 0           | 0           | 0           | 0           |
| d_Bacteria | p_Proteobacteria    | c_Alphaproteobacteria | o_Rhodobacterales                     | f_Rhodobacteraceae                      | g_Defluviimonas                         | 0           | 0           | 0           | 0           | 0           | 0           |
| d_Bacteria | p_Chloroflexi       | c_Chloroflexia        | o_Thermomicrobiales                   | f_JG30-KF-CM45                          | g_JG30-KF-CM45                          | 0           | 0           | 0           | 0           | 0           | 0           |
| d_Bacteria | p_Proteobacteria    | c_Gammaproteobacteria | o_Burkholderiales                     | f_Comamonadaceae                        | g_Rhodoferrax                           | 0           | 0           | 0           | 0           | 0           | 0           |
| d_Bacteria | p_Proteobacteria    | c_Gammaproteobacteria | o_Burkholderiales                     | f_Rhodocyclaceae                        | g_Dechlorobacter                        | 0           | 0.000918964 | 0           | 0           | 0           | 0           |
| d_Bacteria | p_Chloroflexi       | c_Anaerolineae        | o_SJA-15                              | f_SJA-15                                | g_SJA-15                                | 0           | 0           | 0           | 0           | 0           | 0           |
| d_Bacteria | p_Proteobacteria    | c_Alphaproteobacteria | o_Rhizobiales                         | f_Xanthobacteraceae                     | g_Bradyrhizobium                        | 0           | 0           | 0           | 0           | 0           | 0           |
| d_Bacteria | p_Chloroflexi       | c_Anaerolineae        | o_Anaerolineales                      | f_Anaerolineaceae                       | g_Levilinea                             | 0           | 0           | 0           | 0           | 0.000736451 | 0           |
| d_Bacteria | p_Plantomycetota    | c_Plantomycetes       | o_Pirellulales                        | f_Pirellulaceae                         | g_Pir4_lineage                          | 0           | 0           | 0           | 0           | 0           | 0           |
| d_Bacteria | p_Proteobacteria    | c_Alphaproteobacteria | o_Rhizobiales                         | f_Beijerinckiaceae                      | g_uncultured                            | 0           | 0           | 0           | 0           | 0           | 0           |
| d_Bacteria | p_Patescibacteria   | c_Microgenomata       | o_Candidatus_Pacebacteria             | f_Candidatus_Pacebacteria               | g_Candidatus_Pacebacteria               | 0           | 0           | 0           | 0           | 0           | 0           |
| d_Bacteria | p_Actinobacteriota  | c_Actinobacteria      | o_Corynebacteriales                   | f_Nocardiaceae                          | g_Rhodococcus                           | 0           | 0           | 0           | 0           | 0           | 0           |
| d_Bacteria | p_Actinobacteriota  | c_Actinobacteria      | o_Micrococcales                       | f_Microbacteriaceae                     | g_Microbacterium                        | 0           | 0           | 0           | 0           | 0           | 0           |
| d_Bacteria | p_Firmicutes        | c_Bacilli             | o_Erysipelotrichales                  | f_Erysipelotrichaceae                   | g_Turicibacter                          | 0           | 0           | 0           | 0           | 0           | 0           |
| d_Bacteria | p_Firmicutes        | c_Clostridia          | o_Oscillospirales                     | f_[Eubacterium]_coprostanoligenes_group | g_[Eubacterium]_coprostanoligenes_group | 0           | 0           | 0           | 0           | 0           | 0           |
| d_Archaea  | p_Thermoplasmata    | c_Thermoplasmata      | o_Methanomassiliococcales             | f_Methanomassiliococaceae               | g_uncultured                            | 0           | 0           | 0           | 0           | 0.000167375 | 0           |
| d_Bacteria | p_Firmicutes        | c_Clostridia          | o_Oscillospirales                     | f_Oscillospirales                       | g_Hydrogenoanaerobacterium              | 0           | 0.000730994 | 0           | 0           | 0.000164096 | 0           |
| d_Bacteria | p_Cyanobacteria     | c_Vampirivibrionia    | o_Obscuribacteriales                  | f_Obscuribacteraceae                    | g_Candidatus_Obscuribacter              | 0           | 0           | 0           | 0           | 0           | 0           |
| d_Bacteria | p_Sumerlaeota       | c_Sumerlaeota         | o_uncultured                          | f_uncultured                            | g_uncultured                            | 0           | 0           | 0           | 0           | 0           | 0           |
| d_Bacteria | p_Cloacimonadota    | c_Cloacimonadia       | o_Cloacimonadales                     | f_Cloacimonadaceae                      | g_Cloacimonadaceae                      | 0.000710109 | 0           | 0           | 0           | 0           | 0           |
| d_Bacteria | p_Actinobacteriota  | c_Thermoleptophila    | o_Solirubrobacteriales                | f_67-14                                 | g_67-14                                 | 0           | 0           | 0           | 0           | 0           | 0           |
| d_Bacteria | p_Synergistota      | c_Synergistia         | o_Synergistales                       | f_Synergistaceae                        | g_Aminivibrio                           | 0           | 0           | 0           | 0           | 0           | 0           |
| d_Bacteria | p_Firmicutes        | c_Clostridia          | o_Clostridia                          | f_Hungateiclostridiaceae                | g_Fastidiosipila                        | 0           | 0           | 0.000675181 | 0.000586057 | 0           | 0           |
| d_Bacteria | p_Firmicutes        | c_Clostridia          | o_Oscillospirales                     | f_Ruminococcaceae                       | g_uncultured                            | 0           | 0           | 0           | 0           | 0           | 0           |
| d_Bacteria | p_Verrucomicrobiota | c_Omnitrophia         | o_Omnitrophales                       | f_Omnitrophaceae                        | g_Candidatus_Omnitrophus                | 0           | 0           | 0           | 0           | 0           | 0           |
| d_Bacteria | p_Bacteroidota      | c_Bacteroidia         | o_Bacteroidales                       | f_Paludibacteraceae                     | g_Paludibacter                          | 0           | 0.000647452 | 0           | 0           | 0           | 0           |
| d_Bacteria | p_Firmicutes        | c_Clostridia          | o_Clostridia                          | f_Gracilibacteraceae                    | g_Gracilibacteraceae                    | 0           | 0           | 0           | 0           | 0           | 0           |
| d_Bacteria | p_Spirochaetota     | c_Spirochaetia        | o_Spirochaetales                      | f_Spirochaetaceae                       | g_Treponema                             | 0           | 0           | 0           | 0           | 0           | 0           |
| d_Bacteria | p_Actinobacteriota  | c_Acidimicrobia       | o_Microtrichiales                     | f_Illumatobacteraceae                   | g_CL500-29_marine_group                 | 0           | 0           | 0           | 0           | 0           | 0           |
| d_Bacteria | p_Plantomycetota    | c_Pla3_lineage        | o_Pla3_lineage                        | f_Pla3_lineage                          | g_Pla3_lineage                          | 0           | 0           | 0           | 0           | 0           | 0           |
| d_Bacteria | p_Desulfobacterota  | c_Desulfobulbia       | o_Desulfobulbales                     | f_Desulfobulbaceae                      | g_Desulfobulbus                         | 0           | 0.000605681 | 0           | 0           | 0           | 0           |
| d_Bacteria | p_Spirochaetota     | c_Spirochaetia        | o_Spirochaetales                      | f_Spirochaetaceae                       | g_Spirochaeta                           | 0           | 0           | 0           | 0           | 0.00033475  | 0           |
| d_Bacteria | p_Proteobacteria    | c_Alphaproteobacteria | o_Rhizobiales                         | f_Devosiaceae                           | g_Devosia                               | 0           | 0           | 0           | 0           | 0           | 0           |

|   |          |   |                    |   |                         |   |                                     |   |                               |   |                                                    |             |            |             |             |             |   |
|---|----------|---|--------------------|---|-------------------------|---|-------------------------------------|---|-------------------------------|---|----------------------------------------------------|-------------|------------|-------------|-------------|-------------|---|
| d | Bacteria | p | Acidobacteriota    | c | Acidobacteriae          | o | Acidobacteriae                      | f | Acidobacteriae                | g | Paludibaculum                                      | 0           | 0          | 0           | 0           | 0           | 0 |
| d | Bacteria | p | Proteobacteria     | c | Alphaproteobacteria     | o | Sphingomonadales                    | f | Sphingomonadaceae             | g | Novosphingobium                                    | 0           | 0          | 0           | 0           | 0           | 0 |
| d | Archaea  | p | Halobacterota      | c | Methanomicrobia         | o | Methanomicrobiales                  | f | Methanomicrobiaceae           | g | Methanofollis                                      | 0           | 0.00011253 | 0           | 0           | 0           | 0 |
| d | Bacteria | p | Nitrospirota       | c | 4-29-1                  | o | 4-29-1                              | f | 4-29-1                        | g | 4-29-1                                             | 0           | 0          | 0           | 0.000552338 | 8.87E-05    | 0 |
| d | Bacteria | p | Proteobacteria     | c | Alphaproteobacteria     | o | Caulobacterales                     | f | Hyphomonadaceae               | g | Hirschia                                           | 0           | 0          | 0           | 0           | 0           | 0 |
| d | Bacteria | p | Acidobacteriota    | c | Vicinamibacteria        | o | Vicinamibacterales                  | f | uncultured                    | g | uncultured                                         | 0           | 0          | 0           | 0           | 0           | 0 |
| d | Bacteria | p | Bacteroidota       | c | Bacteroidia             | o | Bacteroidales                       | f | Dysgonomonadaceae             | g | Dysgonomonadaceae                                  | 0           | 0          | 0           | 0           | 0           | 0 |
| d | Bacteria | p | Verrucomicrobiota  | c | Chlamydiae              | o | LD1-PA32                            | f | LD1-PA32                      | g | LD1-PA32                                           | 0           | 0          | 0           | 0           | 0           | 0 |
| d | Bacteria | p | Firmicutes         | c | Clostridia              | o | Peptostreptococcales-Tissierellales | f | Peptostreptococcaceae         | g | Acetanaerobium                                     | 0           | 0          | 0           | 0           | 0           | 0 |
| d | Bacteria | p | Firmicutes         | c | Clostridia              | o | Oscillospirales                     | f | Oscillospiraceae              | g | UCG-002                                            | 0           | 0          | 0           | 0           | 0           | 0 |
| d | Bacteria | p | Planctomycetota    | c | Phycisphaerae           | o | Pla1_lineage                        | f | Pla1_lineage                  | g | Pla1_lineage                                       | 0           | 0          | 0           | 0           | 0           | 0 |
| d | Bacteria | p | Proteobacteria     | c | Alphaproteobacteria     | o | Caulobacterales                     | f | Hyphomonadaceae               | g | SW802                                              | 0           | 0          | 0           | 0           | 0           | 0 |
| d | Bacteria | p | Proteobacteria     | c | Alphaproteobacteria     | o | Rhodobacteriales                    | f | Rhodobacteraceae              | g | Amaricoccus                                        | 0           | 0          | 0           | 0           | 0           | 0 |
| d | Bacteria | p | Proteobacteria     | c | Alphaproteobacteria     | o | Rhizobiales                         | f | Hyphomicrobiaceae             | g | Pedomicrobium                                      | 0           | 0          | 0           | 0           | 0           | 0 |
| d | Bacteria | p | Firmicutes         | c | Clostridia              | o | Peptostreptococcales-Tissierellales | f | Peptostreptococcaceae         | g | Intestinibacter                                    | 0           | 0          | 0           | 0           | 0           | 0 |
| d | Bacteria | p | Verrucomicrobiota  | c | Kiritimatiellae         | o | WCHB1-41                            | f | WCHB1-41                      | g | WCHB1-41                                           | 0           | 0          | 0           | 0           | 0           | 0 |
| d | Bacteria | p | Bacteroidota       | c | Bacteroidia             | o | Chitinophagales                     | f | Saprosiraceae                 | g | uncultured                                         | 0           | 0          | 0           | 0           | 0           | 0 |
| d | Bacteria | p | Planctomycetota    | c | Phycisphaerae           | o | mle1-8                              | f | mle1-8                        | g | mle1-8                                             | 0           | 0          | 0           | 0           | 0           | 0 |
| d | Bacteria | p | Planctomycetota    | c | Planctomycetes          | o | Planctomycetales                    | f | uncultured                    | g | uncultured                                         | 0           | 0          | 0           | 0           | 0           | 0 |
| d | Bacteria | p | Proteobacteria     | c | Alphaproteobacteria     | o | Rhizobiales                         | f | Rhizobiaceae                  | g | Allorhizobium-Neorhizobium-Pararhizobium-Rhizobium | 0.000183189 | 0          | 0           | 0           | 0           | 0 |
| d | Bacteria | p | Caldatibacteriota  | c | JS1                     | o | JS1                                 | f | JS1                           | g | JS1                                                | 0           | 0          | 7.50E-05    | 0.000421961 | 0           | 0 |
| d | Bacteria | p | Verrucomicrobiota  | c | Verrucomicrobiae        | o | Pedospaerales                       | f | Pedospaeraceae                | g | DEV114                                             | 0           | 0          | 0           | 0           | 0           | 0 |
| d | Bacteria | p | Firmicutes         | c | Clostridia              | o | Oscillospirales                     | f | uncultured                    | g | uncultured                                         | 0.000417711 | 0          | 0           | 0           | 0           | 0 |
| d | Bacteria | p | Actinobacteriota   | c | Actinobacteria          | o | uncultured                          | f | uncultured                    | g | uncultured                                         | 0           | 0          | 0           | 0           | 0           | 0 |
| d | Bacteria | p | Proteobacteria     | c | Gammaproteobacteria     | o | Burkholderiales                     | f | Rhodocyceae                   | g | Thauera                                            | 0           | 0          | 0           | 0           | 0           | 0 |
| d | Bacteria | p | Verrucomicrobiota  | c | Chlamydiae              | o | Chlamydiales                        | f | Parachlamydiaceae             | g | Neochlamydia                                       | 0           | 0          | 0           | 0           | 0           | 0 |
| d | Bacteria | p | Proteobacteria     | c | Gammaproteobacteria     | o | Burkholderiales                     | f | Sutterellaceae                | g | AA99                                               | 0           | 0          | 0           | 0           | 0           | 0 |
| d | Bacteria | p | Proteobacteria     | c | Gammaproteobacteria     | o | Enterobacteriales                   | f | Enterobacteriaceae            | g | Escherichia-Shigella                               | 0           | 0          | 0           | 0           | 0           | 0 |
| d | Archaea  | p | Halobacterota      | c | Methanomicrobia         | o | Methanomicrobiales                  | f | Methanospirillaceae           | g | Methanospirillum                                   | 0           | 0          | 0           | 0           | 0           | 0 |
| d | Bacteria | p | Verrucomicrobiota  | c | Lentisphaeria           | o | Victivallales                       | f | Victivallaceae                | g | Victivallaceae                                     | 0           | 0          | 0           | 0           | 0           | 0 |
| d | Bacteria | p | Proteobacteria     | c | Alphaproteobacteria     | o | Rhizobiales                         | f | Pleomorphomonadaceae          | g | Pleomorphomonas                                    | 0           | 0          | 0           | 0           | 0           | 0 |
| d | Bacteria | p | Sumerlaeota        | c | Sumerlaeae              | o | Sumerlaeae                          | f | Sumerlaeae                    | g | Sumerlaeae                                         | 0           | 0          | 0           | 0           | 0           | 0 |
| d | Bacteria | p | Bacteroidota       | c | Bacteroidia             | o | Bacteroidales                       | f | Marinilabiliaceae             | g | [Cytophaga] xylanolytica_group                     | 0.000396825 | 0          | 0           | 0           | 0           | 0 |
| d | Bacteria | p | Bacteroidota       | c | Bacteroidia             | o | Bacteroidales                       | f | SB-5                          | g | SB-5                                               | 0           | 0          | 0           | 0           | 0           | 0 |
| d | Bacteria | p | Planctomycetota    | c | Planctomycetes          | o | Planctomycetales                    | f | Rubinisphaeraceae             | g | uncultured                                         | 0           | 0          | 0           | 0           | 0           | 0 |
| d | Bacteria | p | Firmicutes         | c | Clostridia              | o | Lachnospirales                      | f | Lachnospiraceae               | g | Lachnospiraceae_XPB1014_group                      | 0           | 0          | 0           | 0           | 0           | 0 |
| d | Bacteria | p | Firmicutes         | c | Negativicutes           | o | Veillonellales-Selenomonadales      | f | Sporomusaceae                 | g | Sporomusa                                          | 0           | 0          | 0           | 0           | 0           | 0 |
| d | Bacteria | p | Patescibacteria    | c | Parcubacteria           | o | Candidatus_Colwellbacteria          | f | Candidatus_Colwellbacteria    | g | Candidatus_Colwellbacteria                         | 0           | 0          | 0           | 0           | 0           | 0 |
| d | Bacteria | p | Caldisericata      | c | Caldisericia            | o | Caldisericales                      | f | TTA-B1                        | g | TTA-B1                                             | 0           | 0          | 0           | 0           | 0           | 0 |
| d | Bacteria | p | Proteobacteria     | c | Alphaproteobacteria     | o | Rhizobiales                         | f | Xanthobacteraceae             | g | uncultured                                         | 0           | 0          | 0           | 0           | 0           | 0 |
| d | Bacteria | p | Proteobacteria     | c | Alphaproteobacteria     | o | Rhodobacteriales                    | f | Rhodobacteraceae              | g | uncultured                                         | 0           | 0          | 0           | 0           | 0           | 0 |
| d | Bacteria | p | Bacteroidota       | c | Bacteroidia             | o | Bacteroidales                       | f | Barnesiellaceae               | g | uncultured                                         | 0           | 0          | 0           | 0           | 0           | 0 |
| d | Bacteria | p | Firmicutes         | c | Bacilli                 | o | Izemoplasmatales                    | f | Izemoplasmataceae             | g | uncultured                                         | 0           | 0          | 0           | 0           | 0           | 0 |
| d | Bacteria | p | Proteobacteria     | c | Alphaproteobacteria     | o | Rhizobiales                         | f | Devosiaceae                   | g | uncultured                                         | 0           | 0          | 0           | 0           | 0           | 0 |
| d | Bacteria | p | Proteobacteria     | c | Gammaproteobacteria     | o | Burkholderiales                     | f | Rhodocyceae                   | g | Dechloromonas                                      | 0           | 0          | 0           | 0           | 0           | 0 |
| d | Bacteria | p | Proteobacteria     | c | Gammaproteobacteria     | o | Legionellales                       | f | Legionellaceae                | g | Legionella                                         | 0           | 0          | 0           | 0           | 0           | 0 |
| d | Bacteria | p | Armatimonadota     | c | Fimbrimonadia           | o | Fimbrimonadales                     | f | Fimbrimonadaceae              | g | Fimbrimonadaceae                                   | 0           | 0          | 0           | 0           | 0           | 0 |
| d | Bacteria | p | Bacteroidota       | c | Bacteroidia             | o | Bacteroidales                       | f | Rikenellaceae                 | g | Rikenellaceae_RC9_gut_group                        | 0           | 0          | 0           | 0           | 0           | 0 |
| d | Bacteria | p | Firmicutes         | c | Negativicutes           | o | Veillonellales-Selenomonadales      | f | Veillonellaceae               | g | Megasphaera                                        | 0           | 0          | 0           | 0           | 0           | 0 |
| d | Bacteria | p | Firmicutes         | c | Bacilli                 | o | Lactobacillales                     | f | Carnobacteriaceae             | g | Trichococcus                                       | 0           | 0          | 0           | 0           | 0           | 0 |
| d | Bacteria | p | Firmicutes         | c | Clostridia              | o | Oscillospirales                     | f | UCG-010                       | g | UCG-010                                            | 0           | 0          | 0           | 8.37E-05    | 0.000310566 | 0 |
| d | Bacteria | p | Patescibacteria    | c | Saccharimonadia         | o | Saccharimonadales                   | f | Saccharimonadaceae            | g | Saccharimonadales                                  | 0           | 0          | 0           | 0           | 0           | 0 |
| d | Bacteria | p | Proteobacteria     | c | Gammaproteobacteria     | o | Burkholderiales                     | f | Comamonadaceae                | g | Rhizobacter                                        | 0           | 0          | 0           | 0           | 0           | 0 |
| d | Bacteria | p | Chloroflexi        | c | Anaerolineae            | o | Caldilineales                       | f | Caldilineaceae                | g | uncultured                                         | 0           | 0          | 0           | 0           | 0           | 0 |
| d | Bacteria | p | Desulfobacterota   | c | uncultured              | o | uncultured                          | f | uncultured                    | g | uncultured                                         | 0           | 0          | 0           | 0           | 0           | 0 |
| d | Bacteria | p | Proteobacteria     | c | Alphaproteobacteria     | o | uncultured                          | f | uncultured                    | g | uncultured                                         | 0           | 0          | 0           | 0           | 0           | 0 |
| d | Bacteria | p | Firmicutes         | c | Clostridia              | o | Oscillospirales                     | f | Ruminococcaceae               | g | Caproiciproducens                                  | 0           | 0          | 0           | 0           | 0           | 0 |
| d | Bacteria | p | Chloroflexi        | c | Dehalococcoidia         | o | FS117-23B-02                        | f | FS117-23B-02                  | g | FS117-23B-02                                       | 0           | 0          | 0           | 0           | 0           | 0 |
| d | Bacteria | p | Firmicutes         | c | Clostridia              | o | Monoglobales                        | f | Monoglobaceae                 | g | Monoglobus                                         | 0           | 4.18E-05   | 0           | 0           | 0           | 0 |
| d | Bacteria | p | Planctomycetota    | c | Planctomycetes          | o | Planctomycetales                    | f | Rubinisphaeraceae             | g | SH-PL14                                            | 0           | 0          | 0           | 0           | 0           | 0 |
| d | Bacteria | p | Bdellovibrionota   | c | Oligoflexia             | o | O319-6G20                           | f | O319-6G20                     | g | O319-6G20                                          | 0           | 0          | 0           | 0           | 0           | 0 |
| d | Bacteria | p | Verrucomicrobiota  | c | Chlamydiae              | o | Chlamydiales                        | f | Parachlamydiaceae             | g | Candidatus_Proteochlamydia                         | 0           | 0          | 0           | 0           | 0           | 0 |
| d | Bacteria | p | Proteobacteria     | c | Alphaproteobacteria     | o | Micropepsales                       | f | Micropepsaceae                | g | uncultured                                         | 0           | 0          | 0           | 0           | 0           | 0 |
| d | Bacteria | p | WS4                | c | WS4                     | o | WS4                                 | f | WS4                           | g | WS4                                                | 0           | 0          | 0           | 0           | 0           | 0 |
| d | Bacteria | p | Actinobacteriota   | c | Actinobacteria          | o | PeM15                               | f | PeM15                         | g | PeM15                                              | 0           | 0          | 0           | 0           | 0           | 0 |
| d | Bacteria | p | Bacteroidota       | c | Bacteroidia             | o | Chitinophagales                     | f | Chitinophagaceae              | g | Ferruginibacter                                    | 0           | 0          | 0           | 0           | 0           | 0 |
| d | Bacteria | p | Firmicutes         | c | Clostridia              | o | Oscillospirales                     | f | Oscillospiraceae              | g | Sporobacter                                        | 0           | 0          | 0           | 0.0002678   | 0.000266199 | 0 |
| d | Bacteria | p | Chloroflexi        | c | Anaerolineae            | o | MSB-5E12                            | f | MSB-5E12                      | g | MSB-5E12                                           | 0           | 0          | 0           | 0.00020085  | 0.000266199 | 0 |
| d | Bacteria | p | Acidobacteriota    | c | Holophagae              | o | Holophagales                        | f | Holophagaceae                 | g | Holophaga                                          | 0           | 0          | 0           | 0           | 0           | 0 |
| d | Bacteria | p | Campylobacterota   | c | Campylobacteria         | o | Campylobacteriales                  | f | Arcobacteraceae               | g | Arcobacter                                         | 0           | 0          | 0           | 0           | 0           | 0 |
| d | Bacteria | p | Synergistota       | c | Synergistia             | o | Synergistales                       | f | Synergistaceae                | g | Cloacibacillus                                     | 0           | 0          | 0           | 0           | 0           | 0 |
| d | Bacteria | p | Actinobacteriota   | c | Acidimicrobia           | o | IMCC26256                           | f | IMCC26256                     | g | IMCC26256                                          | 0           | 0          | 0           | 0           | 0           | 0 |
| d | Bacteria | p | Marinimicrobia (S) | c | Marinimicrobia (SAR406) | o | Marinimicrobia (SAR406 clade)       | f | Marinimicrobia (SAR406 clade) | g | Marinimicrobia (SAR406 clade)                      | 0           | 0          | 0           | 0           | 0           | 0 |
| d | Bacteria | p | Proteobacteria     | c | Alphaproteobacteria     | o | Rhizobiales                         | f | Hyphomicrobiaceae             | g | uncultured                                         | 0           | 0          | 0           | 0           | 0           | 0 |
| d | Bacteria | p | Chloroflexi        | c | Anaerolineae            | o | Anaerolineales                      | f | Anaerolineaceae               | g | ADurb.Bin120                                       | 0           | 0.00018755 | 0.000257865 | 0           | 0           | 0 |
| d | Bacteria | p | Proteobacteria     | c | Alphaproteobacteria     | o | Rhizobiales                         | f | Rhizobiaceae                  | g | Mesorhizobium                                      | 0           | 0.00018797 | 0           | 0           | 0           | 0 |
| d | Bacteria | p | Proteobacteria     | c | Alphaproteobacteria     | o | Rhodobacteriales                    | f | Rhodobacteraceae              | g | Paracoccus                                         | 0           | 0          | 0           | 0           | 0           | 0 |
| d | Bacteria | p | Fibrobacterota     | c | Fibrobacteria           | o | Fibrobacterales                     | f | Fibrobacteraceae              | g | Fibrobacter                                        | 0           | 0          | 0           | 0           | 0           | 0 |
| d | Bacteria | p | Proteobacteria     | c | Alphaproteobacteria     | o | Rhizobiales                         | f | Rhizobiaceae                  | g | uncultured                                         | 0           | 0          | 0           | 0           | 0           | 0 |

|            |          |   |                   |   |                     |   |                                     |   |                            |   |                               |             |            |             |   |   |   |
|------------|----------|---|-------------------|---|---------------------|---|-------------------------------------|---|----------------------------|---|-------------------------------|-------------|------------|-------------|---|---|---|
| d          | Bacteria | p | Proteobacteria    | c | Alphaproteobacteria | o | Rhizobiales                         | f | Xanthobacteraceae          | g | Pseudorhodoplanes             | 0           | 0          | 0           | 0 | 0 | 0 |
| d          | Bacteria | p | Firmicutes        | c | Clostridia          | o | Christensenellales                  | f | Christensenellaceae        |   |                               | 0           | 0          | 0           | 0 | 0 | 0 |
| d          | Bacteria | p | Caldiseriata      | c | Caldiseriata        | o | Caldiseriales                       | f | Caldiseriaceae             | g | Caldisericum                  | 0           | 0          | 0           | 0 | 0 | 0 |
| d          | Bacteria | p | Firmicutes        | c | Syntrophomonadia    | o | Syntrophomonadales                  | f | Syntrophomonadaceae        | g | Pelospira                     | 0           | 0          | 0           | 0 | 0 | 0 |
| d          | Bacteria | p | Patescibacteria   | c | Parcubacteria       | o | Candidatus_Nomurabacteria           | f | Candidatus_Nomurabacteria  | g | Candidatus_Nomurabacteria     | 0           | 0          | 0           | 0 | 0 | 0 |
| d          | Bacteria | p | Planctomycetota   | c | Pla4_lineage        | o | Pla4_lineage                        | f | Pla4_lineage               | g | Pla4_lineage                  | 0           | 0          | 0           | 0 | 0 | 0 |
| d          | Bacteria | p | Actinobacteriota  | c | Actinobacteria      | o | Corynebacteriales                   | f | Nocardiaceae               | g | Gordonia                      | 0           | 0          | 0           | 0 | 0 | 0 |
| d          | Archaea  | p | Euryarchaeota     | c | Thermococci         | o | Methanofastidiosales                | f | Methanofastidiosaceae      | g | Candidatus_Methanofastidiosum | 0           | 0          | 0           | 0 | 0 | 0 |
| d          | Bacteria | p | Chloroflexi       | c | Anaerolineae        | o | Anaerolineales                      | f | Anaerolineaceae            | g | Anaerolineaceae_UCG-001       | 0           | 0          | 0           | 0 | 0 | 0 |
| d          | Bacteria | p | Verrucomicrobiota | c | Verrucomicrobiae    | o | LD1-PB3                             | f | LD1-PB3                    | g | LD1-PB3                       | 0           | 0          | 0           | 0 | 0 | 0 |
| d          | Bacteria | p | Proteobacteria    | c | Alphaproteobacteria | o | Sphingomonadales                    | f | Sphingomonadaceae          | g | Sphingopyxis                  | 0           | 0          | 0           | 0 | 0 | 0 |
| d          | Bacteria | p | Bacteroidota      | c | Ignavibacteria      | o | Ignavibacteriales                   | f | SR-FBR-L83                 | g | SR-FBR-L83                    | 0           | 0          | 0           | 0 | 0 | 0 |
| d          | Bacteria | p | Firmicutes        | c | Clostridia          | o | Oscillospirales                     | f | uncultured                 | g | uncultured                    | 0           | 0          | 0           | 0 | 0 | 0 |
| d          | Bacteria | p | Proteobacteria    | c | Gammaproteobacteria | o | Burkholderiales                     | f | Rhodocyceae                | g | Azospira                      | 0.000213721 | 0.00018797 | 0           | 0 | 0 | 0 |
| d          | Bacteria | p | Proteobacteria    | c | Alphaproteobacteria | o | Rhizobiales                         | f | Hyphomicrobiaceae          | g | uncultured                    | 0           | 0          | 0           | 0 | 0 | 0 |
| d          | Bacteria | p | Proteobacteria    | c | Gammaproteobacteria | o | Burkholderiales                     | f | SC1-84                     | g | SC1-84                        | 0           | 0          | 0           | 0 | 0 | 0 |
| d          | Bacteria | p | Actinobacteriota  | c | Actinobacteria      | o | Propionibacteriales                 | f | Propionibacteriaceae       | g | Brooklawnia                   | 0           | 0          | 0           | 0 | 0 | 0 |
| d          | Bacteria | p | Campilobacterota  | c | Campylobacteria     | o | Campylobacterales                   | f | Sulfurimonadaceae          | g | Sulfuricum                    | 0           | 0          | 0           | 0 | 0 | 0 |
| d          | Bacteria | p | Firmicutes        | c | Clostridia          | o | Clostridiales                       | f | Clostridiaceae             | g | Youngiibacter                 | 0           | 0          | 0           | 0 | 0 | 0 |
| d          | Bacteria | p | Patescibacteria   | c | ABY1                | o | Candidatus_Kerfeldbacteria          | f | Candidatus_Kerfeldbacteria | g | Candidatus_Kerfeldbacteria    | 0           | 0          | 0           | 0 | 0 | 0 |
| d          | Bacteria | p | Planctomycetota   | c | Planctomycetes      | o | Pirellulales                        | f | Pirellulaceae              | g | Pirellula                     | 0           | 0          | 0           | 0 | 0 | 0 |
| d          | Bacteria | p | Bacteroidota      | c | Bacteroidia         | o | Bacteroidales                       |   |                            |   |                               | 0           | 0          | 0           | 0 | 0 | 0 |
| d          | Bacteria | p | Patescibacteria   | c | Microgenomata       | o | Candidatus_Collierbacteria          | f | Candidatus_Collierbacteria | g | Candidatus_Collierbacteria    | 0           | 0          | 0           | 0 | 0 | 0 |
| d          | Bacteria | p | Planctomycetota   | c | Phycisphaerae       | o | CCM11a                              | f | CCM11a                     | g | CCM11a                        | 0           | 0          | 0           | 0 | 0 | 0 |
| d          | Bacteria | p | Planctomycetota   | c | Planctomycetes      | o | Isosphaerales                       | f | Isosphaeraeae              | g | uncultured                    | 0           | 0          | 0           | 0 | 0 | 0 |
| d          | Bacteria | p | Bacteroidota      | c | Ignavibacteria      | o | Ignavibacteriales                   | f | Meliobacteraceae           | g | IheB3-7                       | 0           | 0          | 0           | 0 | 0 | 0 |
| d          | Bacteria | p | Firmicutes        | c | Clostridia          | o | Clostridia                          | f | Hungateiclostridiaceae     | g | Saccharofermentans            | 0           | 0          | 0           | 0 | 0 | 0 |
| d          | Bacteria | p | Proteobacteria    | c | Alphaproteobacteria | o | Dongiales                           | f | Dongiaceae                 | g | Dongia                        | 0           | 0          | 0           | 0 | 0 | 0 |
| d          | Bacteria | p | Proteobacteria    | c | Gammaproteobacteria | o | Burkholderiales                     | f | Rhodocyceae                | g | Ferribacterium                | 0           | 0          | 0           | 0 | 0 | 0 |
| d          | Bacteria | p | Acidobacteriota   | c | Holophagae          | o | Holophagales                        | f | Holophagaceae              |   |                               | 0           | 0          | 0           | 0 | 0 | 0 |
| d          | Bacteria | p | Actinobacteriota  | c | Acidimicrobia       | o | Microtrichales                      | f | uncultured                 | g | uncultured                    | 0           | 0          | 0           | 0 | 0 | 0 |
| d          | Bacteria | p | Desulfobacterota  | c | Desulfuromonadia    | o | Geobacterales                       | f | Geobacteraceae             | g | Geobacter                     | 0           | 0          | 0           | 0 | 0 | 0 |
| d          | Bacteria | p | Proteobacteria    | c | Alphaproteobacteria | o | Rhizobiales                         | f | Bejerinckiaceae            | g | Bosea                         | 0           | 0          | 0           | 0 | 0 | 0 |
| d          | Bacteria | p | Proteobacteria    | c | Alphaproteobacteria | o | Rhizobiales                         | f | Methyloligellaceae         | g | uncultured                    | 0           | 0          | 0           | 0 | 0 | 0 |
| d          | Bacteria | p | Proteobacteria    | c | Alphaproteobacteria | o | Sphingomonadales                    | f | Sphingomonadaceae          | g | Sphingosinicella              | 0           | 0          | 0           | 0 | 0 | 0 |
| d          | Bacteria | p | Proteobacteria    | c | Gammaproteobacteria | o | Celvibrionales                      | f | Spongibacteraceae          | g | BD1-7 clade                   | 0           | 0          | 0           | 0 | 0 | 0 |
| d          | Bacteria | p | Firmicutes        | c | Clostridia          |   |                                     |   |                            |   | 0                             | 0           | 0          | 0           | 0 | 0 |   |
| d          | Bacteria | p | Actinobacteriota  | c | Actinobacteria      | o | Micrococcales                       | f | Microbacteriaceae          | g | Parafrirogibacterium          | 0           | 0          | 0           | 0 | 0 | 0 |
| d          | Bacteria | p | Dependentiae      | c | Babeliae            | o | Babeliales                          | f | Babeliales                 | g | Babeliales                    | 0           | 0          | 0           | 0 | 0 | 0 |
| d          | Bacteria | p | Firmicutes        | c | Clostridia          | o | Clostridiales                       | f | Clostridiaceae             | g | Sarcina                       | 0           | 0          | 0           | 0 | 0 | 0 |
| d          | Bacteria | p | Patescibacteria   | c | Microgenomata       | o | Candidatus_Shapirobacteria          | f | Candidatus_Shapirobacteria | g | Candidatus_Shapirobacteria    | 0           | 0          | 0           | 0 | 0 | 0 |
| d          | Bacteria | p | Proteobacteria    | c | Gammaproteobacteria | o | Burkholderiales                     | f | Rhodocyceae                |   |                               | 0.000104428 | 0          | 0           | 0 | 0 | 0 |
| d          | Bacteria | p | Firmicutes        | c | Limnochordia        | o | Limnochordales                      | f | Limnochordaceae            | g | Limnochordaceae               | 0           | 0          | 0.000164096 | 0 | 0 | 0 |
| d          | Bacteria | p | Firmicutes        | c | Clostridia          | o | Peptostreptococcales-Tissierellales | f | Peptostreptococcaceae      | g | Peptoclostridium              | 0           | 0          | 0           | 0 | 0 | 0 |
| d          | Archaea  | p | Crenarchaeota     | c | Bathyrarchaeia      | o | Bathyrarchaeia                      | f | Bathyrarchaeia             | g | Bathyrarchaeia                | 0           | 0          | 0           | 0 | 0 | 0 |
| d          | Archaea  | p | Euryarchaeota     | c | Thermococci         | o | Methanofastidiosales                | f | uncultured                 | g | uncultured                    | 0           | 0          | 0           | 0 | 0 | 0 |
| d          | Bacteria | p | Actinobacteriota  | c | Actinobacteria      | o | Frankiales                          | f | Sporichthyaceae            | g | Longivirga                    | 0           | 0          | 0           | 0 | 0 | 0 |
| d          | Bacteria | p | Actinobacteriota  | c | Actinobacteria      | o | Micrococcales                       | f | Dermatophilaceae           | g | Kineosphaera                  | 0           | 0          | 0           | 0 | 0 | 0 |
| d          | Bacteria | p | Bacteroidota      | c | Bacteroidia         | o | Bacteroidales                       | f | Bacteroidales_UCG-001      | g | Bacteroidales_UCG-001         | 0           | 0          | 0           | 0 | 0 | 0 |
| d          | Bacteria | p | Proteobacteria    | c | Gammaproteobacteria | o | Burkholderiales                     | f | Comamonadaceae             | g | Sphaerotilus                  | 0           | 0          | 0           | 0 | 0 | 0 |
| d          | Bacteria | p | Spirochaetota     | c | MVP-15              | o | MVP-15                              | f | MVP-15                     | g | MVP-15                        | 0           | 0          | 0           | 0 | 0 | 0 |
| d          | Bacteria | p | Desulfobacterota  | c | Desulfuromonadia    | o | Desulfuromonadia                    | f | Desulfuromonadaceae        | g |                               | 0.00015004  | 0          | 0           | 0 | 0 | 0 |
| d          | Bacteria | p | Proteobacteria    | c | Gammaproteobacteria | o | Xanthomonadales                     | f | Xanthomonadaceae           | g | Arenimonas                    | 0           | 0          | 0           | 0 | 0 | 0 |
| d          | Bacteria | p | Methylomirabilota | c | Methylomirabilia    | o | Methylomirabiales                   | f | Methylomirabilaceae        | g | Sh7658-TzT-35                 | 0           | 0          | 0           | 0 | 0 | 0 |
| d          | Bacteria | p | Planctomycetota   | c | Planctomycetes      | o | Pirellulales                        | f | Pirellulaceae              | g | Pir3_lineage                  | 0           | 0          | 0           | 0 | 0 | 0 |
| d          | Bacteria | p | Proteobacteria    | c | Alphaproteobacteria | o | Rhizobiales                         | f | Labraceae                  | g | Labrys                        | 0           | 0          | 0           | 0 | 0 | 0 |
| Unassigned |          |   |                   |   |                     |   |                                     |   |                            |   |                               |             |            | 0.000140654 | 0 | 0 |   |
| d          | Bacteria | p | Actinobacteriota  | c | Actinobacteria      | o | Micrococcales                       | f | Intrasporangiaceae         | g | Tetrasphaera                  | 0           | 0          | 0           | 0 | 0 | 0 |
| d          | Bacteria | p | Firmicutes        | c | Clostridia          | o | Lachnospirales                      | f | Lachnospiraceae            | g |                               | 0           | 0          | 0           | 0 | 0 | 0 |
| d          | Bacteria | p | Planctomycetota   | c | Phycisphaerae       | o | MSB9                                | f | SG8-4                      | g | SG8-4                         | 0           | 0          | 0           | 0 | 0 | 0 |
| d          | Bacteria | p | Proteobacteria    | c | Alphaproteobacteria | o | Rhizobiales                         | f | Xanthobacteraceae          | g | Alfia                         | 0           | 0          | 0           | 0 | 0 | 0 |
| d          | Bacteria | p | Verrucomicrobiota | c | Chlamydiae          | o | Chlamydiales                        | f | Criblamydiaceae            | g | Criblamydiaceae               | 0           | 0          | 0           | 0 | 0 | 0 |
| d          | Bacteria | p | Bacteroidota      | c | Bacteroidia         | o | Bacteroidales                       | f | M2PB4-65 termite group     | g | M2PB4-65 termite group        | 0           | 0          | 0           | 0 | 0 | 0 |
| d          | Bacteria | p | Firmicutes        | c | Desulfitobacteria   | o | Desulfitobacteriales                | f | Syntrophobotulaceae        | g | Dehalobacter                  | 0           | 0          | 0           | 0 | 0 | 0 |
| d          | Bacteria | p | Verrucomicrobiota | c | Chlamydiae          | o | Chlamydiales                        | f | Parachlamydiaceae          |   |                               | 0           | 0          | 0           | 0 | 0 | 0 |
| d          | Bacteria | p | Firmicutes        | c | Clostridia          | o | Clostridiales                       | f | Clostridiaceae             | g |                               | 0.000122126 | 0          | 0           | 0 | 0 | 0 |
| d          | Bacteria | p | Patescibacteria   | c | Parcubacteria       | o | Candidatus_Vogelbacteria            | f | Candidatus_Vogelbacteria   | g | Candidatus_Vogelbacteria      | 0           | 0          | 0           | 0 | 0 | 0 |
| d          | Bacteria | p | Proteobacteria    | c | Gammaproteobacteria | o | Burkholderiales                     | f | Rhodocyceae                | g | Sulfuritalea                  | 0           | 0          | 0           | 0 | 0 | 0 |
| d          | Bacteria | p | Actinobacteriota  | c | Actinobacteria      | o | Frankiales                          | f | Nakamurellaceae            | g | Nakamurella                   | 0           | 0          | 0           | 0 | 0 | 0 |
| d          | Bacteria | p | Actinobacteriota  | c | Actinobacteria      | o | Micrococcales                       | f | Microbacteriaceae          | g | Leucobacter                   | 0           | 0          | 0           | 0 | 0 | 0 |
| d          | Bacteria | p | Bacteroidota      | c | Ignavibacteria      | o | Ignavibacteriales                   |   |                            |   | 0                             | 0           | 0          | 0           | 0 | 0 | 0 |
| d          | Bacteria | p | Proteobacteria    | c | Alphaproteobacteria | o | Caulobacterales                     | f | Hyphomonadaceae            | g | uncultured                    | 0           | 0          | 0           | 0 | 0 | 0 |
| d          | Bacteria | p | Proteobacteria    | c | Alphaproteobacteria | o | Reyranelles                         | f | Reyranelleae               | g | Reyranelle                    | 0           | 0          | 0           | 0 | 0 | 0 |
| d          | Bacteria | p | Proteobacteria    | c | Alphaproteobacteria | o | Rickettsiales                       | f | Mitochondria               | g | Mitochondria                  | 0           | 0          | 0           | 0 | 0 | 0 |
| d          | Bacteria | p | Proteobacteria    | c | Alphaproteobacteria | o | Sphingomonadales                    | f | Sphingomonadaceae          | g | Sphingobium                   | 0           | 0          | 0           | 0 | 0 | 0 |
| d          | Bacteria | p | Proteobacteria    | c | Gammaproteobacteria | o | Gammaproteobacteria_Incertae_Sedis  | f | Unknown_Family             | g | Acidibacter                   | 0           | 0          | 0           | 0 | 0 | 0 |
| d          | Bacteria | p | Proteobacteria    | c | Gammaproteobacteria | o | R7C24                               | f | R7C24                      | g | R7C24                         | 0           | 0          | 0           | 0 | 0 | 0 |
| d          | Bacteria | p | Actinobacteriota  | c | Actinobacteria      | o | Propionibacteriales                 | f | Propionibacteriaceae       | g | uncultured                    | 0           | 0          | 0           | 0 | 0 | 0 |
| d          | Bacteria | p | Campilobacterota  | c | Campylobacteria     | o | Campylobacterales                   | f | Sulfurovum                 | g | Sulfurovum                    | 0           | 0          | 0           | 0 | 0 | 0 |

|   |          |   |                   |   |                     |   |                                     |   |                                     |   |                                    |   |   |   |             |   |   |
|---|----------|---|-------------------|---|---------------------|---|-------------------------------------|---|-------------------------------------|---|------------------------------------|---|---|---|-------------|---|---|
| d | Bacteria | p | Patescibacteria   | c | Saccharimonadia     | o | Saccharimonadales                   | f | LWQ8                                | g | LWQ8                               | 0 | 0 | 0 | 0           | 0 | 0 |
| d | Bacteria | p | Acidobacteriota   | c | Acidobacteriae      | o | GOUTB8                              | f | GOUTB8                              | g | GOUTB8                             | 0 | 0 | 0 | 0           | 0 | 0 |
| d | Bacteria | p | Acidobacteriota   | c | Blastocatellia      | o | DS-100                              | f | DS-100                              | g | DS-100                             | 0 | 0 | 0 | 0           | 0 | 0 |
| d | Bacteria | p | Firmicutes        | c | Clostridia          | o | Oscillospirales                     | f | Oscillospiraceae                    | g | Papillibacter                      | 0 | 0 | 0 | 0           | 0 | 0 |
| d | Bacteria | p | Patescibacteria   | c | Parcubacteria       | o | 32-520                              | f | 32-520                              | g | 32-520                             | 0 | 0 | 0 | 0           | 0 | 0 |
| d | Bacteria | p | Proteobacteria    | c | Alphaproteobacteria | o | Sphingomonadales                    | f | Sphingomonadaceae                   | g | Sphingomonas                       | 0 | 0 | 0 | 0           | 0 | 0 |
| d | Bacteria | p | Proteobacteria    | c | Gammaproteobacteria | o | Burkholderiales                     | f | Comamonadaceae                      | g | Ottowia                            | 0 | 0 | 0 | 0           | 0 | 0 |
| d | Bacteria | p | Verrucomicrobiota | c | Lentisphaeria       | o | Victivallales                       | f | vadinBE97                           | g | vadinBE97                          | 0 | 0 | 0 | 0           | 0 | 0 |
| d | Bacteria | p | Bacteroidota      | c | Bacteroidia         | o | Bacteroidales                       | f | Prolibacteraceae                    | g | Mariniphaga                        | 0 | 0 | 0 | 0           | 0 | 0 |
| d | Bacteria | p | Firmicutes        | c | Clostridia          | o | Peptostreptococcales-Tissierellales | f | Peptostreptococcales-Tissierellales | g | W5053                              | 0 | 0 | 0 | 0           | 0 | 0 |
| d | Bacteria | p | Proteobacteria    | c | Alphaproteobacteria | o | Caulobacterales                     | f | Hyphomonadaceae                     | g | Unknown Family                     | 0 | 0 | 0 | 0           | 0 | 0 |
| d | Bacteria | p | Proteobacteria    | c | Gammaproteobacteria | o | Gammaproteobacteria Incertae Sed    | f | Unknown Family                      | g | Candidatus Berkiella               | 0 | 0 | 0 | 0           | 0 | 0 |
| d | Bacteria | p | Acidobacteriota   | c | Acidobacteriae      | o | Solibacterales                      | f | Solibacteraceae                     | g | Candidatus Solibacter              | 0 | 0 | 0 | 0.000100425 | 0 | 0 |
| d | Bacteria | p | Desulfobacterota  | c | Desulfobacterota    | o | Desulfobacteriales                  | f | Desulfobacteriaceae                 | g | uncultured                         | 0 | 0 | 0 | 0           | 0 | 0 |
| d | Bacteria | p | Actinobacteriota  | c | Actinobacteria      | o | Propionibacteriales                 | f | Propionibacteriaceae                | g | Propionicimonas                    | 0 | 0 | 0 | 0           | 0 | 0 |
| d | Bacteria | p | Chloroflexi       | c | KD4-96              | o | KD4-96                              | f | KD4-96                              | g | KD4-96                             | 0 | 0 | 0 | 0           | 0 | 0 |
| d | Bacteria | p | Proteobacteria    | c | Alphaproteobacteria | o | Rhizobiales                         | f | A0839                               | g | A0839                              | 0 | 0 | 0 | 0           | 0 | 0 |
| d | Bacteria | p | Sva0485           | c | Sva0485             | o | Sva0485                             | f | Sva0485                             | g | Sva0485                            | 0 | 0 | 0 | 0           | 0 | 0 |
| d | Bacteria | p | Acidobacteriota   | c | Thermoanaerobaculia | o | Thermoanaerobaculales               | f | Thermoanaerobaculaceae              | g | Thermoanaerobaculum                | 0 | 0 | 0 | 0           | 0 | 0 |
| d | Bacteria | p | Actinobacteriota  | c | Acidimicrobia       | o | Microtrichales                      | f | Jamiaceae                           | g | Jamia                              | 0 | 0 | 0 | 0           | 0 | 0 |
| d | Bacteria | p | Actinobacteriota  | c | Acidimicrobia       | o | Microtrichales                      | f | Microtrichaceae                     | g | IMC26207                           | 0 | 0 | 0 | 0           | 0 | 0 |
| d | Bacteria | p | Patescibacteria   | c | ABY1                | o | Candidatus_Falkowbacteria           | f | Candidatus_Falkowbacteria           | g | Candidatus_Falkowbacteria          | 0 | 0 | 0 | 0           | 0 | 0 |
| d | Bacteria | p | Patescibacteria   | c | Parcubacteria       | o | Parcubacteria                       | f | Parcubacteria                       | g | Parcubacteria                      | 0 | 0 | 0 | 0           | 0 | 0 |
| d | Bacteria | p | Proteobacteria    | c | Gammaproteobacteria | o | PLTA13                              | f | PLTA13                              | g | PLTA13                             | 0 | 0 | 0 | 0           | 0 | 0 |
| d | Bacteria | p | Bacteroidota      | c | Bacteroidia         | o | Sphingobacteriales                  | f | AKYH767                             | g | AKYH767                            | 0 | 0 | 0 | 0           | 0 | 0 |
| d | Bacteria | p | Chloroflexi       | c | SHA-26              | o | SHA-26                              | f | SHA-26                              | g | SHA-26                             | 0 | 0 | 0 | 0           | 0 | 0 |
| d | Bacteria | p | Deinococota       | c | Deinococci          | o | Deinococcales                       | f | Deinococcaceae                      | g | Deinococcus                        | 0 | 0 | 0 | 0           | 0 | 0 |
| d | Bacteria | p | Patescibacteria   | c | ABY1                | o | Candidatus_Magasanikbacteria        | f | Candidatus_Magasanikbacteria        | g | Candidatus_Magasanikbacteria       | 0 | 0 | 0 | 0           | 0 | 0 |
| d | Bacteria | p | Patescibacteria   | c | Parcubacteria       | o | Parcubacteria                       | f | Parcubacteria                       | g | Parcubacteria                      | 0 | 0 | 0 | 0           | 0 | 0 |
| d | Bacteria | p | Planctomycetota   | c | Planctomycetes      | o | Pirellulales                        | f | Pirellulaceae                       | g | Blastopirellula                    | 0 | 0 | 0 | 0           | 0 | 0 |
| d | Bacteria | p | Planctomycetota   | c | Planctomycetes      | o | Planctomycetales                    | f | Schlesneriaceae                     | g | Planctopirius                      | 0 | 0 | 0 | 0           | 0 | 0 |
| d | Bacteria | p | Planctomycetota   | c | Planctomycetes      | o | Planctomycetales                    | f | Schlesneriaceae                     | g | Schlesneria                        | 0 | 0 | 0 | 0           | 0 | 0 |
| d | Bacteria | p | Proteobacteria    | c | Alphaproteobacteria | o | Holosporales                        | f | Holosporaceae                       | g | uncultured                         | 0 | 0 | 0 | 0           | 0 | 0 |
| d | Bacteria | p | Proteobacteria    | c | Gammaproteobacteria | o | Burkholderiales                     | f | Nitrosomonadaceae                   | g | Ellin6067                          | 0 | 0 | 0 | 0           | 0 | 0 |
| d | Bacteria | p | Proteobacteria    | c | Gammaproteobacteria | o | Methylococcales                     | f | Methylococcaceae                    | g | Methyloparacoccus                  | 0 | 0 | 0 | 0           | 0 | 0 |
| d | Bacteria | p | Verrucomicrobiota | c | Verrucomicrobiae    | o | Opitutales                          | f | Opitutaceae                         | g | Lacunisphaera                      | 0 | 0 | 0 | 0           | 0 | 0 |
| d | Bacteria | p | Cyanobacteria     | c | Vampirivibronia     | o | Obscuribacteriales                  | f | Obscuribacteraceae                  | g | Obscuribacteraceae                 | 0 | 0 | 0 | 0           | 0 | 0 |
| d | Bacteria | p | Verrucomicrobiota | c | Lentisphaeria       | o | Oligosphaerales                     | f | Lenti-02                            | g | Lenti-02                           | 0 | 0 | 0 | 0           | 0 | 0 |
| d | Bacteria | p | Bdellovibrionota  | c | Bdellovibrionia     | o | Bdellovibrionales                   | f | Bdellovibrionaceae                  | g | Bdellovibrionia                    | 0 | 0 | 0 | 0           | 0 | 0 |
| d | Bacteria | p | Firmicutes        | c | BRH-c20a            | o | BRH-c20a                            | f | BRH-c20a                            | g | BRH-c20a                           | 0 | 0 | 0 | 0           | 0 | 0 |
| d | Bacteria | p | Gemmatimonadota   | c | MD2902-B12          | o | MD2902-B12                          | f | MD2902-B12                          | g | MD2902-B12                         | 0 | 0 | 0 | 0           | 0 | 0 |
| d | Bacteria | p | Actinobacteriota  | c | Thermoleophila      | o | Gaiellales                          | f | Gaiellaceae                         | g | Gaiella                            | 0 | 0 | 0 | 0           | 0 | 0 |
| d | Bacteria | p | Bacteroidota      | c | Kryptonia           | o | Kryptoniales                        | f | BSV26                               | g | BSV26                              | 0 | 0 | 0 | 0           | 0 | 0 |
| d | Bacteria | p | Dependentiae      | c | Babeliae            | o | Babeliales                          | f | Vermiphilaceae                      | g | Vermiphilaceae                     | 0 | 0 | 0 | 0           | 0 | 0 |
| d | Bacteria | p | NB1-j             | c | NB1-j               | o | NB1-j                               | f | NB1-j                               | g | NB1-j                              | 0 | 0 | 0 | 0           | 0 | 0 |
| d | Bacteria | p | Planctomycetota   | c | Planctomycetes      | o | uncultured                          | f | uncultured                          | g | uncultured                         | 0 | 0 | 0 | 0           | 0 | 0 |
| d | Bacteria | p | Proteobacteria    | c | Alphaproteobacteria | o | Sphingomonadales                    | f | Sphingomonadaceae                   | g | Polymorphobacter                   | 0 | 0 | 0 | 0           | 0 | 0 |
| d | Bacteria | p | Proteobacteria    | c | Gammaproteobacteria | o | Competibacterales                   | f | Competibacteraceae                  | g | Candidatus Competibacter           | 0 | 0 | 0 | 0           | 0 | 0 |
| d | Bacteria | p | Proteobacteria    | c | Gammaproteobacteria | o | Diplorickeetsiales                  | f | Diplorickeetsiaceae                 | g | Rickettsiella                      | 0 | 0 | 0 | 0           | 0 | 0 |
| d | Bacteria | p | Acidobacteriota   | c | Holophagae          | o | Subgroup_7                          | f | Subgroup_7                          | g | Subgroup_7                         | 0 | 0 | 0 | 0           | 0 | 0 |
| d | Bacteria | p | Actinobacteriota  | c | Actinobacteria      | o | Propionibacteriales                 | f | Propionibacteriaceae                | g | Propioniciclava                    | 0 | 0 | 0 | 0           | 0 | 0 |
| d | Bacteria | p | Bdellovibrionota  | c | Bdellovibrionia     | o | Bacteriovoracales                   | f | Bacteriovoracaceae                  | g | Peredibacter                       | 0 | 0 | 0 | 0           | 0 | 0 |
| d | Bacteria | p | Myxococota        | c | Polyangia           | o | Polyangiales                        | f | Polyangiaceae                       | g | uncultured                         | 0 | 0 | 0 | 0           | 0 | 0 |
| d | Bacteria | p | Proteobacteria    | c | Alphaproteobacteria | o | Rhizobiales                         | f | Bejerinckiaceae                     | g | Bejerinckiaceae                    | 0 | 0 | 0 | 0           | 0 | 0 |
| d | Bacteria | p | Proteobacteria    | c | Alphaproteobacteria | o | Rhodobacterales                     | f | Rhodobacteraceae                    | g | Roseobacter_clade_CHAB-I-5_lineage | 0 | 0 | 0 | 0           | 0 | 0 |
| d | Bacteria | p | Proteobacteria    | c | Gammaproteobacteria | o | Burkholderiales                     | f | Aquaspirillaceae                    | g | Rivicola                           | 0 | 0 | 0 | 0           | 0 | 0 |
| d | Bacteria | p | Proteobacteria    | c | Gammaproteobacteria | o | Xanthomonadales                     | f | Xanthomonadaceae                    | g | Pseudoxanthomonas                  | 0 | 0 | 0 | 0           | 0 | 0 |
| d | Bacteria | p | Chloroflexi       | c | OLB14               | o | OLB14                               | f | OLB14                               | g | OLB14                              | 0 | 0 | 0 | 0           | 0 | 0 |
| d | Bacteria | p | Patescibacteria   | c | Microgenomata       | o | Candidatus_Levybacteria             | f | Candidatus_Levybacteria             | g | Candidatus_Levybacteria            | 0 | 0 | 0 | 0           | 0 | 0 |
| d | Bacteria | p | Proteobacteria    | c | Alphaproteobacteria | o | Azospirillales                      | f | Inquilinaceae                       | g | Inquilinus                         | 0 | 0 | 0 | 0           | 0 | 0 |
| d | Bacteria | p | Proteobacteria    | c | Alphaproteobacteria | o | Caulobacterales                     | f | Caulobacteraceae                    | g | Caulobacter                        | 0 | 0 | 0 | 0           | 0 | 0 |
| d | Bacteria | p | Proteobacteria    | c | Gammaproteobacteria | o | Burkholderiales                     | f | Nitrosomonadaceae                   | g | Nitrosomonas                       | 0 | 0 | 0 | 0           | 0 | 0 |
| d | Bacteria | p | Proteobacteria    | c | Gammaproteobacteria | o | Coxiellales                         | f | Coxiellaceae                        | g | Coxiella                           | 0 | 0 | 0 | 0           | 0 | 0 |
| d | Bacteria | p | Proteobacteria    | c | Gammaproteobacteria | o | uncultured                          | f | uncultured                          | g | uncultured                         | 0 | 0 | 0 | 0           | 0 | 0 |
| d | Bacteria | p | Acidobacteriota   | c | Subgroup_18         | o | Subgroup_18                         | f | Subgroup_18                         | g | Subgroup_18                        | 0 | 0 | 0 | 0           | 0 | 0 |
| d | Bacteria | p | Bacteroidota      | c | Bacteroidia         | o | Bacteroidales                       | f | p-251-o5                            | g | p-251-o5                           | 0 | 0 | 0 | 0           | 0 | 0 |
| d | Bacteria | p | Bacteroidota      | c | Bacteroidia         | o | Chitinophagales                     | f | uncultured                          | g | uncultured                         | 0 | 0 | 0 | 0           | 0 | 0 |
| d | Bacteria | p | Proteobacteria    | c | Gammaproteobacteria | o | Diplorickeetsiales                  | f | Diplorickeetsiaceae                 | g | uncultured                         | 0 | 0 | 0 | 0           | 0 | 0 |
| d | Archaea  | p | Halobacterota     | c | Methanomicrobia     | o | Methanomicrobiales                  | f | Methanocorpusculaceae               | g | Methanocorpusculum                 | 0 | 0 | 0 | 0           | 0 | 0 |
| d | Bacteria | p | Firmicutes        | c | Clostridia          | o | Oscillospirales                     | f | Ethanoliengenaceae                  | g | Acetanaerobacterium                | 0 | 0 | 0 | 0           | 0 | 0 |
| d | Bacteria | p | Proteobacteria    | c | Alphaproteobacteria | o | Acetobacterales                     | f | Acetobacteraceae                    | g | Roseomonas                         | 0 | 0 | 0 | 0           | 0 | 0 |
| d | Bacteria | p | Verrucomicrobiota | c | Chlamydiae          | o | Chlamydiales                        | f | cvE6                                | g | cvE6                               | 0 | 0 | 0 | 0           | 0 | 0 |
| d | Bacteria | p | Verrucomicrobiota | c | Verrucomicrobiae    | o | Chthoniobacteriales                 | f | Terrimicrobiaceae                   | g | Terrimicrobium                     | 0 | 0 | 0 | 0           | 0 | 0 |
| d | Bacteria | p | Actinobacteriota  | c | Thermoleophila      | o | Solirubrobacteriales                | f | Solirubrobacteraceae                | g | Conexibacter                       | 0 | 0 | 0 | 0           | 0 | 0 |
| d | Bacteria | p | Bacteroidota      | c | Bacteroidia         | o | Bacteroidales                       | f | Dysgonomonadaceae                   | g | uncultured                         | 0 | 0 | 0 | 0           | 0 | 0 |
| d | Bacteria | p | Bacteroidota      | c | Bacteroidia         | o | Sphingobacteriales                  | f | S15A-MN91                           | g | S15A-MN91                          | 0 | 0 | 0 | 0           | 0 | 0 |
| d | Bacteria | p | Firmicutes        | c | Clostridia          | o | Clostridiales                       | f | Clostridiaceae                      | g | Clostridium_sensu_stricto_12       | 0 | 0 | 0 | 0           | 0 | 0 |
| d | Bacteria | p | Proteobacteria    | c | Gammaproteobacteria | o | Nitrosococcales                     | f | Nitrosococcaceae                    | g | CI75cm.2.12                        | 0 | 0 | 0 | 0           | 0 | 0 |
| d | Bacteria | p | Bacteroidota      | c | Bacteroidia         | o | Flavobacteriales                    | f | NS9_marine_group                    | g | NS9_marine_group                   | 0 | 0 | 0 | 0           | 0 | 0 |

|            |                     |                       |                                       |                              |                   |   |   |   |   |   |   |
|------------|---------------------|-----------------------|---------------------------------------|------------------------------|-------------------|---|---|---|---|---|---|
| d_Bacteria | p_Fibrobacterota    | c_Fibrobacteria       | o_Fibrobacterales                     | f_Fibrobacterales            | g_BBMC-4          | 0 | 0 | 0 | 0 | 0 | 0 |
| d_Bacteria | p_Firmicutes        | c_Clostridia          | o_Peptostreptococcales-Tissierellales |                              |                   | 0 | 0 | 0 | 0 | 0 | 0 |
| d_Bacteria | p_Myxococcota       | c_Polyangia           | o_Haliangiales                        | f_Haliangiaceae              | g_Haliangium      | 0 | 0 | 0 | 0 | 0 | 0 |
| d_Bacteria | p_Patescibacteria   | c_Microgenomatia      | o_Microgenomatia                      | f_Microgenomatia             | g_Microgenomatia  | 0 | 0 | 0 | 0 | 0 | 0 |
| d_Bacteria | p_Proteobacteria    | c_Alphaproteobacteria | o_Rhizobiales                         | f_Rhizobiales_Incertae_Sedis | g_Bauldia         | 0 | 0 | 0 | 0 | 0 | 0 |
| d_Bacteria | p_Proteobacteria    | c_Gammaproteobacteria |                                       |                              |                   | 0 | 0 | 0 | 0 | 0 | 0 |
| d_Bacteria | p_Bacteroidota      | c_Bacteroidia         | o_Bacteroidales                       | f_Prolixibacteraceae         | g_Roseimarinus    | 0 | 0 | 0 | 0 | 0 | 0 |
| d_Bacteria | p_Bacteroidota      | c_Bacteroidia         | o_Bacteroidales                       | f_Rikenellaceae              | g_SP3-e08         | 0 | 0 | 0 | 0 | 0 | 0 |
| d_Bacteria | p_Bdellovibrionota  | c_Oligoflexia         | o_Oligoflexales                       | f_uncultured                 | g_uncultured      | 0 | 0 | 0 | 0 | 0 | 0 |
| d_Bacteria | p_Calditrichota     | c_Calditrichia        | o_Calditrichales                      | f_Calditrichaceae            | g_SM23-31         | 0 | 0 | 0 | 0 | 0 | 0 |
| d_Bacteria | p_Chloroflexi       | c_Dehalococcoidia     | o_Dehalococcoidales                   | f_Dehalococcoidaceae         | g_Dehalogenimonas | 0 | 0 | 0 | 0 | 0 | 0 |
| d_Bacteria | p_Firmicutes        | c_Clostridia          | o_Lachnospirales                      | f_Lachnospiraceae            | g_Epulopiscium    | 0 | 0 | 0 | 0 | 0 | 0 |
| d_Bacteria | p_MBNT15            | c_MBNT15              | o_MBNT15                              | f_MBNT15                     | g_MBNT15          | 0 | 0 | 0 | 0 | 0 | 0 |
| d_Bacteria | p_Myxococcota       | c_bacteriap25         | o_bacteriap25                         | f_bacteriap25                | g_bacteriap25     | 0 | 0 | 0 | 0 | 0 | 0 |
| d_Bacteria | p_Planctomycetota   | c_Planctomycetes      | o_Pirellulales                        | f_Pirellulaceae              | g_Pir2_lineage    | 0 | 0 | 0 | 0 | 0 | 0 |
| d_Bacteria | p_Proteobacteria    | c_Alphaproteobacteria | o_Sphingomonadales                    | f_Sphingomonadaceae          |                   | 0 | 0 | 0 | 0 | 0 | 0 |
| d_Bacteria | p_Proteobacteria    | c_Gammaproteobacteria | o_Burkholderiales                     |                              |                   | 0 | 0 | 0 | 0 | 0 | 0 |
| d_Bacteria | p_Proteobacteria    | c_Gammaproteobacteria | o_Xanthomonadales                     | f_Rhodanobacteraceae         | g_Chiayivirga     | 0 | 0 | 0 | 0 | 0 | 0 |
| d_Bacteria | p_Chloroflexi       | c_Anaerolineae        |                                       |                              |                   | 0 | 0 | 0 | 0 | 0 | 0 |
| d_Bacteria | p_Firmicutes        | c_Bacilli             | o_Erysipelotrichales                  | f_Erysipelotrichaceae        | g_Erysipelothrix  | 0 | 0 | 0 | 0 | 0 | 0 |
| d_Bacteria | p_Firmicutes        | c_Negativicutes       | o_Veillonellales-Selenomonadales      | f_Veillonellaceae            | g_Veillonella     | 0 | 0 | 0 | 0 | 0 | 0 |
| d_Bacteria | p_Proteobacteria    | c_Gammaproteobacteria | o_Burkholderiales                     | f_Hydrogenophilaceae         | g_Thiobacillus    | 0 | 0 | 0 | 0 | 0 | 0 |
| d_Bacteria | p_Proteobacteria    | c_Gammaproteobacteria | o_Gammaproteobacteria_Incertae_Sedis  | f_Unknown Family             | g_Unknown Family  | 0 | 0 | 0 | 0 | 0 | 0 |
| d_Bacteria | p_Verrucomicrobiota | c_Verrucomicrobiae    | o_Pedosphaerales                      | f_Pedosphaeraceae            |                   | 0 | 0 | 0 | 0 | 0 | 0 |
