# Supplementary material for: Nitrous oxide inhibition of methanogenesis represents an underappreciated greenhouse gas emission feedback
Source: PubMed Central journal article supplement (PMC10960958; doi:10.1093/ismejo/wrae027), 2024-03-06
Supplement: yin_n2o_ch4_si_10_wrae027.pdf [file yin_n2o_ch4_si_10_wrae027.pdf]

## Supplemental Information

### Nitrous oxide inhibition of methanogenesis represents an underappreciated greenhouse gas emission feedback

Yongchao Yin<sup>1,2,6</sup> #, Fadime Kara-Murdoch<sup>1,6</sup> &, Robert W. Murdoch<sup>2</sup> &, Jun Yan<sup>1,2,5</sup>, Gao Chen<sup>1,3</sup>, Yongchao Xie<sup>1,3</sup> ‡, Yanchen Sun<sup>1,3</sup> and Frank E. Löffler<sup>1,2,3,4,6</sup> \*

<sup>1</sup>Center for Environmental Biotechnology, <sup>2</sup>Department of Microbiology, <sup>3</sup>Department of Civil and Environmental Engineering, <sup>4</sup>Department of Biosystems Engineering and Soil Science, University of Tennessee, Knoxville, Tennessee 37996, USA. <sup>5</sup>Key Laboratory of Pollution Control and Environmental Engineering, Institute of Applied Ecology, Chinese Academy of Sciences, Shenyang, Liaoning 110016, China. <sup>6</sup>Biosciences Division, Oak Ridge National Laboratory, Oak Ridge, Tennessee 37831, USA

Current addresses:

# Department of Biology, Northeastern University, Boston, MA 02148, USA

& Battelle Memorial Institute, Columbus, OH 43201, USA

‡ Department of Chemistry and Biochemistry, University of California, Los Angeles, CA 90095, USA.

\*Corresponding author: Frank E. Löffler, E-mail: frank.loeffler@utk.edu

### Supplemental information summary:

Supplemental methods, 13 tables and references. Table S13 is in a separate file.

## Supplemental Methods

### Methanogenic cultures and growth condition

To determine if *M. barkeri* employing different methanogenic pathways exhibits different sensitivities to N<sub>2</sub>O, cultures were pre-grown with MeOH, H<sub>2</sub>/CO<sub>2</sub> or acetate for at least three consecutive transfers and then examined for the impact of N<sub>2</sub>O on CH<sub>4</sub> production. Also analyzed were three methanogenic mixed cultures derived from an anaerobic digester (Kuwahee Wastewater Treatment Plant, Knoxville, TN, USA). The three different enrichments were derived from the same inoculum and enriched with H<sub>2</sub>/CO<sub>2</sub>, acetate, or MeOH for at least six consecutive transfers (inoculum size 3%, v/v).

**N<sub>2</sub>O stocks and calculation of aqueous phase N<sub>2</sub>O concentrations.** To achieve final aqueous N<sub>2</sub>O concentrations ranging from 10 to 200 μM in cell suspension assay vials, 10-fold diluted (with N<sub>2</sub>) N<sub>2</sub>O gas stocks were prepared in sealed 60 mL serum bottles. Briefly, 60-mL serum bottles containing 3-5 glass beads (5 mm diameter, Sigma-Aldrich, St Louis, MO, USA) and sealed with thick butyl rubber stoppers were flushed with pure N<sub>2</sub> gas for 5 minutes before 6 mL of N<sub>2</sub> gas was replaced with 6 mL N<sub>2</sub>O (≥99%, Sigma-Aldrich, St Louis, MO, USA) using plastic syringes. After mixing the gas stock by manual shaking, different volumes of N<sub>2</sub>O stock, 0.1 – 1.0 mL of N<sub>2</sub>O gas (undiluted or 10-fold diluted in N<sub>2</sub>), were withdrawn with plastic syringes equipped with 0.2 μm membrane filter units (Millipore, Sigma-Aldrich, St Louis, MO, USA) with 18-gauge needles and directly injected into the experimental vessels.

The volume of N<sub>2</sub>O stock required in assay vials and final aqueous N<sub>2</sub>O concentrations in culture vessels was calculated from the headspace concentration using a dimensionless Henry's constant for N<sub>2</sub>O at 30°C of 1.94 based on the equation

$C_{\text{aq}} = C_{\text{g}}/H_{\text{cc}}$  [1, 2].  $C_{\text{aq}}$  is the aqueous  $\text{N}_2\text{O}$  concentration ( $\mu\text{M}$ ),  $C_{\text{g}}$  is the headspace  $\text{N}_2\text{O}$  concentration ( $\mu\text{mol L}^{-1}$ ), and  $H_{\text{cc}}$  is the Henry's constant (dimensionless). For example, to achieve 100  $\mu\text{M}$  aqueous phase  $\text{N}_2\text{O}$  in 160 mL vessels with 100 mL of medium and a 60 mL headspace, a total 523  $\mu\text{L}$  of pure  $\text{N}_2\text{O}$  gas was directly injected into each vessel. Based on Henry's law using a dimensionless Henry's constant of 1.94 for  $\text{N}_2\text{O}$ , a volume of 282  $\mu\text{L}$   $\text{N}_2\text{O}$  existed in the 60 mL headspace and 241  $\mu\text{L}$   $\text{N}_2\text{O}$  dissolves in 100 mL of the medium resulting in an aqueous phase concentration of 100  $\mu\text{M}$  after equilibration. After equilibration, the headspace  $\text{N}_2\text{O}$  concentrations in the assay vials were measured by injecting 100  $\mu\text{L}$  headspace samples into an Agilent 7890A GC equipped with an HP-PLOT Q column (30 m length  $\times$  0.320 mm diameter, 20  $\mu\text{m}$  film thickness) and a microelectron capture detector as previously described [3].

**Whole cell suspension assays.** The substrate concentration ranges (**Tables S2**) used in cell suspension assays were chosen so that both unsaturated and saturated states of active cells were captured and  $K_{\text{m}}$  and  $V_{\text{max}}$  values within the chosen initial substrate concentrations could be captured [4, 5]. Specifically, cell suspension assays were performed in 20-mL glass vials flushed with  $\text{N}_2/\text{CO}_2$  (80/20, v/v) and sealed with Teflon-lined butyl rubber stoppers held in place with aluminum crimps. A series of 8 to 10 assay vials, each with a fixed initial substrate concentration [S] as listed in **Tables S3-S8**, were prepared for each substrate assay (i.e., MeOH, acetate, and  $\text{H}_2$ ). After equilibration, assay vials received 0.1 mL of 1,000-fold concentrated cell suspensions to initiate activity. That is, each assay vial received a fixed initial substrate concentration [S] and the same abundance of active cells (i.e., cell titers), and the amount of  $\text{CH}_4$  produced was measured six times over a 3-hour incubation period. The corresponding

initial CH<sub>4</sub> production rates associated with each substrate concentration [S] were then determined from the slopes of the progression curves of CH<sub>4</sub> production over time. Note that the linear regression analysis (i.e., the slope) of the progression curves of CH<sub>4</sub> produced over time in each assay vial included at least four measurements. Using such a monitoring scheme, one initial CH<sub>4</sub> production rate  $V$  was generated from one fixed initial substrate concentration [S]. The initial CH<sub>4</sub> production rate  $V$  increases with initial substrate concentration [S] until reaching saturation with maximum CH<sub>4</sub> production rates. Preliminary experiments determined the appropriate cell titers and substrate concentrations so that no more than 50% of initial substrate had been consumed at the end of the 3-hour incubation period and the initial CH<sub>4</sub> production rates were not impacted by acetate, H<sub>2</sub>, or MeOH availability.

The resulting initial CH<sub>4</sub> production rates  $V$  determined with different initial substrate concentrations [S] were then used as input values for Michaelis-Menten one-substrate one-inhibitor models to determine the kinetic parameters. The maximum CH<sub>4</sub> production rate  $V_{\max}$  and the half-velocity constant  $K_m$  for each treatment were calculated using the Michaelis-Menten nonlinear regression models using  $R$ . Data sets from assays amended with increasing N<sub>2</sub>O concentrations were fit to the competitive, non-competitive, and un-competitive inhibition models to determine the inhibitory constant,  $K_i$ , of N<sub>2</sub>O on CH<sub>4</sub> production from the different substrates. The best-fit inhibition model presented was chosen based on the highest coefficient of determination ( $R^2$ ) and the lowest standard deviation of the residuals ( $Sy.x.$ ). From the best-fit inhibition models, the Michaelis-Menten plots were generated for each

methanogenic substrate (i.e., acetate, MeOH, and H<sub>2</sub>) for data visualization and the determination of  $K_i$ .

**16S rRNA gene amplicon sequencing.** 16S rRNA genes were amplified using the 341F/785R primer pair (CCTACGGGNGGCWGCAG / GACTACHVGGGTATCTAATCC) [6]. The resulting PCR amplicons were purified and sequenced on an Illumina MiSeq in 275 base pair (bp) paired end mode. The amplicon sequencing data were analyzed using a custom workflow constructed in the QIIME 2 environment [7]. Adapters were removed using Cutadapt [8]. Reads were then trimmed, error corrected, and purged of chimeric amplicons using dada2 operated in paired-end mode with no read truncation [9]. The resulting actual sequence variants (ASVs) were classified using the QIIME 2 sklearn feature classifier against a pretrained Silva v138 99% taxonomic classifier [10].

**Archaeal reference tree generation.** Available archaeal 16S rRNA gene sequences of at least 1,300 bp in length were downloaded from the Integrated Microbial Genomes database [11] (806 sequences) and subjected to 97% identity clustering using CD-HIT [12]. The resulting 297 representative sequences were aligned with MAFFT-auto [13]. The alignment was trimmed using TrimAl with -gappycout [14] and subjected to maximum likelihood phylogenetic reconstruction using RaxML v8.2.12 [15] with rapid bootstrapping, GTR gamma likelihood substitution matrix, and autoMRE bootstopping. RaxML was operated via the CIPRES Science Gateway [16]. ASV sequences classified as archaeal were added to the archaeal reference tree using MAFFT –add fragments and RaxML evolutionary placement algorithm (EPA, -f v). The resulting \*.jplace file was visualized at the Interactive Tree of Life website [17].

**Table S1.** Whole cell suspension assays to determine CH<sub>4</sub> production kinetics.

| Culture           | Substrate and Inhibitor Concentrations (μM) |                  |                |                  |                |                  |
|-------------------|---------------------------------------------|------------------|----------------|------------------|----------------|------------------|
|                   | MeOH                                        | N <sub>2</sub> O | H <sub>2</sub> | N <sub>2</sub> O | Acetate        | N <sub>2</sub> O |
| <i>M. barkeri</i> | 200 – 7 500                                 | 0, 100, 200      | 1.0 – 333      | 0, 50, 100       | 2 500 – 50 000 | 0, 20, 40        |
| Mixed cultures    | 100 – 10 000                                | 0, 50, 100       | 0.2 – 333      | 0, 30, 60        | 2.5 – 20 000   | 0, 10, 30        |

**Table S2.** Initial CH<sub>4</sub> production rates versus acetate concentrations in *M. barkeri* cell suspension assays in the presence of 0, 20 and 40 μM N<sub>2</sub>O.

| Acetate (μM)        | V <sup>a</sup> | Acetate (μM)           | V <sup>a</sup> | Acetate (μM)           | V <sup>a</sup> |
|---------------------|----------------|------------------------|----------------|------------------------|----------------|
| No N <sub>2</sub> O |                | 20 μM N <sub>2</sub> O |                | 40 μM N <sub>2</sub> O |                |
| 2.5                 | 0.44           | 2.5                    | 0.33           | 2.5                    | 0.10           |
| 5.0                 | 9.70           | 5.0                    | 7.36           | 5.0                    | 3.24           |
| 7.5                 | 12.4           | 7.5                    | 9.22           | 7.5                    | 3.92           |
| 10.0                | 17.8           | 10.0                   | 12.51          | 10.0                   | 5.20           |
| 15.0                | 25.8           | 15.0                   | 13.18          | 15.0                   | 8.35           |
| 20.0                | 27.3           | 20.0                   | 15.07          | 20.0                   | 9.14           |
| 30.0                | 29.5           | 30.0                   | 16.41          | 30.0                   | 8.44           |
| 40.0                | 28.4           | 40.0                   | 18.55          | 40.0                   | 10.47          |
| 50.0                | 29.2           | 50.0                   | 19.22          | 50.0                   | 9.94           |

<sup>a</sup> Initial CH<sub>4</sub> production rate (nmol CH<sub>4</sub> produced min<sup>-1</sup> mg protein<sup>-1</sup>)

**Table S3.** Initial CH<sub>4</sub> production rates versus H<sub>2</sub> concentrations in *M. barkeri* whole cell suspension assays in the presence of 0, 50 and 100 μM N<sub>2</sub>O.

| H <sub>2</sub> (μM) | V <sup>a</sup> | H <sub>2</sub> (μM)    | V <sup>a</sup> | H <sub>2</sub> (μM)     | V <sup>a</sup> |
|---------------------|----------------|------------------------|----------------|-------------------------|----------------|
| No N <sub>2</sub> O |                | 50 μM N <sub>2</sub> O |                | 100 μM N <sub>2</sub> O |                |
| 1.1                 | 7.91           | 1.1                    | 3.30           | 1.1                     | 0.91           |
| 2.1                 | 17.44          | 2.1                    | 5.49           | 2.1                     | 1.62           |
| 4.2                 | 24.40          | 4.2                    | 9.79           | 4.2                     | 2.92           |
| 8.4                 | 30.18          | 8.4                    | 13.90          | 8.4                     | 6.19           |
| 21.0                | 47.56          | 21.0                   | 23.89          | 21.0                    | 13.01          |
| 41.6                | 53.22          | 41.6                   | 36.22          | 41.6                    | 22.56          |
| 83.3                | 85.35          | 83.3                   | 56.59          | 83.3                    | 38.01          |
| 208.0               | 103.46         | 208.0                  | 80.67          | 208.0                   | 48.91          |
| 333.0               | 122.12         | 333.0                  | 84.55          | 333.0                   | 54.88          |

<sup>a</sup> Initial CH<sub>4</sub> production rate (nmol CH<sub>4</sub> produced min<sup>-1</sup> mg protein<sup>-1</sup>)

**Table S4.** Initial CH<sub>4</sub> production rates versus MeOH concentrations in *M. barkeri* whole cell suspension assays in the presence of 0, 100 and 200 μM N<sub>2</sub>O.

| MeOH (μM)           | V <sup>a</sup> | MeOH (μM)               | V <sup>a</sup> | MeOH (μM)               | V <sup>a</sup> |
|---------------------|----------------|-------------------------|----------------|-------------------------|----------------|
| No N <sub>2</sub> O |                | 100 μM N <sub>2</sub> O |                | 200 μM N <sub>2</sub> O |                |
| 125                 | 25.1           | 125                     | 15.9           | 100                     | 8.9            |
| 250                 | 47.8           | 250                     | 28.2           | 250                     | 21.4           |
| 500                 | 80.8           | 500                     | 52.3           | 500                     | 37.0           |
| 750                 | 106.2          | 750                     | 75.5           | 1000                    | 69.1           |
| 1250                | 163.8          | 1250                    | 101.1          | 2000                    | 96.0           |
| 2000                | 220.0          | 2000                    | 124.3          | 3750                    | 119.0          |
| 2500                | 253.7          | 2500                    | 159.1          | 5000                    | 128.7          |
| 3700                | 296.8          | 3700                    | 181.6          | 7500                    | 131.4          |
| 5000                | 328.2          | 5000                    | 187.0          |                         |                |

|      |       |      |       |
|------|-------|------|-------|
| 7500 | 352.8 | 7500 | 200.0 |
|------|-------|------|-------|

<sup>a</sup> Initial CH<sub>4</sub> production rate (nmol CH<sub>4</sub> produced min<sup>-1</sup> mg protein<sup>-1</sup>)

**Table S5.** Initial CH<sub>4</sub> production rates versus acetate concentrations in acetate-enriched mixed culture whole cell suspension assays in the presence of 0, 10 and 30 μM N<sub>2</sub>O.

| Acetate (μM)        | V <sup>a</sup> | Acetate (μM)           | V <sup>a</sup> | Acetate (μM)           | V <sup>a</sup> |
|---------------------|----------------|------------------------|----------------|------------------------|----------------|
| No N <sub>2</sub> O |                | 10 μM N <sub>2</sub> O |                | 30 μM N <sub>2</sub> O |                |
| 2.5                 | 0.72           | 2.5                    | 0.22           | 2.5                    | 0.22           |
| 5.0                 | 1.64           | 5.0                    | 0.62           | 5.0                    | 0.29           |
| 10                  | 2.91           | 10                     | 1.51           | 10                     | 0.35           |
| 100                 | 5.91           | 50                     | 2.88           | 50                     | 0.92           |
| 500                 | 12.84          | 100                    | 3.27           | 100                    | 2.64           |
| 1 000               | 18.12          | 1 000                  | 12.41          | 1 000                  | 5.97           |
| 5 000               | 20.38          | 5 000                  | 13.95          | 5 000                  | 6.04           |
| 10 000              | 21.12          | 10 000                 | 15.22          | 10 000                 | 6.17           |
| 20 000              | 23.54          | 20 000                 | 17.04          | 20 000                 | 7.69           |

<sup>a</sup> Initial CH<sub>4</sub> production rate (nmol CH<sub>4</sub> produced min<sup>-1</sup> mg protein<sup>-1</sup>)

**Table S6.** Initial CH<sub>4</sub> production rates versus H<sub>2</sub> concentrations in H<sub>2</sub>/CO<sub>2</sub>-enriched mixed culture whole cell suspension assays in the presence of 0, 30 and 60 μM N<sub>2</sub>O.

| H <sub>2</sub> (μM) | V <sup>a</sup> | H <sub>2</sub> (μM)    | V <sup>a</sup> | H <sub>2</sub> (μM)    | V <sup>a</sup> |
|---------------------|----------------|------------------------|----------------|------------------------|----------------|
| No N <sub>2</sub> O |                | 30 μM N <sub>2</sub> O |                | 60 μM N <sub>2</sub> O |                |
| 0.2                 | 0.5            | 0.2                    | 0.3            | 2.1                    | 0.2            |
| 2.1                 | 4.9            | 2.1                    | 2.7            | 4.2                    | 3.7            |
| 4.2                 | 11.3           | 4.2                    | 8.6            | 8.4                    | 10.2           |
| 8.4                 | 24.6           | 8.4                    | 17.5           | 21.0                   | 29.8           |
| 21.0                | 66.4           | 21.0                   | 45.3           | 41.6                   | 39.8           |
| 41.6                | 79.6           | 41.6                   | 50.8           | 83.3                   | 45.4           |
| 83.3                | 88.4           | 83.3                   | 58.7           | 165.5                  | 50.7           |
| 166.5               | 90.3           | 208                    | 60.6           | 333                    | 52.4           |
| 333.0               | 97.1           | 249.6                  | 63.2           |                        |                |



|       |      |
|-------|------|
| 333.0 | 66.6 |
|-------|------|

<sup>a</sup> Initial CH<sub>4</sub> production rate (nmol CH<sub>4</sub> produced min<sup>-1</sup> mg protein<sup>-1</sup>)

**Table S7.** Initial CH<sub>4</sub> production rates versus MeOH concentrations in MeOH-enriched mixed culture whole cell suspension assays in the presence of 0, 50 and 100 μM N<sub>2</sub>O.

| MeOH (μM)           | V <sup>a</sup> | MeOH (μM)              | V <sup>a</sup> | MeOH (μM)               | V <sup>a</sup> |
|---------------------|----------------|------------------------|----------------|-------------------------|----------------|
| No N <sub>2</sub> O |                | 50 μM N <sub>2</sub> O |                | 100 μM N <sub>2</sub> O |                |
| 2.5                 | 1.4            | 2.5                    | 0.9            | 2.5                     | 0.6            |
| 10                  | 5.6            | 10                     | 3.6            | 10                      | 2.7            |
| 25                  | 13.4           | 25                     | 7.6            | 25                      | 6.7            |
| 100                 | 43.8           | 100                    | 25.5           | 100                     | 25.1           |
| 500                 | 124.9          | 500                    | 78.6           | 500                     | 57.5           |
| 1 000               | 158.5          | 1000                   | 115.1          | 1 000                   | 78.6           |
| 2 000               | 169.8          | 2 000                  | 137.6          | 2 000                   | 86.6           |
| 3 500               | 191.5          | 3 500                  | 138.8          | 3 500                   | 90.4           |
| 6 000               | 190.5          | 6 000                  | 142            | 6 000                   | 96.4           |

<sup>a</sup> Initial CH<sub>4</sub> production rate (nmol CH<sub>4</sub> produced min<sup>-1</sup> mg protein<sup>-1</sup>)

**Table S8.** Inhibition models used in whole cell suspension assays.

|                                                                                                                                                                            |                                                                                         |
|----------------------------------------------------------------------------------------------------------------------------------------------------------------------------|-----------------------------------------------------------------------------------------|
| Michaelis-Menten Equation:<br>$v_0 = \frac{V_{\max} [S]}{K_m + [S]}$                                                                                                       | Uncompetitive inhibition:<br>$v_0 = \frac{V_{\max} [S]}{(K_m + \alpha [S])} \quad (3)$  |
| Competitive inhibition:<br>$v_0 = \frac{V_{\max} [S]}{(\alpha K_m + [S])} \quad (1)$                                                                                       | Noncompetitive inhibition:<br>$v_0 = \frac{V_{\max} [S]}{\alpha (K_m + [S])} \quad (2)$ |
| For simplification, the factor of inhibitor concentrations and inhibition constants in equations (1) to (3) are shown as $\alpha$ , whereby $\alpha = 1 + \frac{[I]}{K_i}$ |                                                                                         |

**Table S9.** Statistical parameters ( $R^2$  and  $Sy.x$  values) used for determining the best-fit inhibition models and inhibition constants in cell suspension amended with  $N_2O$  as inhibitor.

| Culture           | Substrate | Inhibitor | Tested models         | Statistical Parameters |             | $K_i$ ( $\mu M$ )  |
|-------------------|-----------|-----------|-----------------------|------------------------|-------------|--------------------|
|                   |           |           |                       | $R^2$                  | $Sy.x$      |                    |
| <i>M. barkeri</i> | Acetate   | $N_2O$    | <b>Noncompetitive</b> | <b>0.97</b>            | <b>2.41</b> | <b>24.8 ± 3.1</b>  |
|                   |           |           | Uncompetitive         | 0.96                   | 2.77        | 14.9 ± 2.6         |
|                   |           |           | Competitive           | 0.95                   | 2.99        | 7.7 ± 1.8          |
| <i>M. barkeri</i> | $H_2$     | $N_2O$    | <b>Noncompetitive</b> | <b>0.98</b>            | <b>6.36</b> | <b>90.6 ± 10.8</b> |
|                   |           |           | Competitive           | 0.98                   | 7.55        | 16.6 ± 3.6         |
|                   |           |           | Uncompetitive         | 0.97                   | 8.26        | 66.0 ± 11.5        |
| <i>M. barkeri</i> | MeOH      | $N_2O$    | Noncompetitive        | 0.99                   | 10.11       | 80.1 ± 5.3         |
|                   |           |           | <b>Uncompetitive</b>  | <b>0.99</b>            | <b>7.03</b> | <b>130.9 ± 4.7</b> |
|                   |           |           | Competitive           | -                      | -           | -                  |
| Mixed culture     | Acetate   | $N_2O$    | <b>Uncompetitive</b>  | <b>0.99</b>            | <b>1.17</b> | <b>17.7 ± 1.8</b>  |
|                   |           |           | Noncompetitive        | 0.99                   | 10.11       | 15.9 ± 1.8         |
|                   |           |           | Competitive           | 0.95                   | 2.71        | 0.6 ± 0.3          |
| Mixed culture     | $H_2$     | $N_2O$    | Uncompetitive         | 0.98                   | 6.34        | 50.9 ± 6.9         |
|                   |           |           | <b>Noncompetitive</b> | <b>0.99</b>            | <b>5.15</b> | <b>62.1 ± 6.4</b>  |
|                   |           |           | Competitive           | 0.95                   | 9.88        | 11.3 ± 4.3         |
| Mixed culture     | MeOH      | $N_2O$    | <b>Noncompetitive</b> | <b>0.99</b>            | <b>5.99</b> | <b>109.9 ± 6.8</b> |
|                   |           |           | Uncompetitive         | 0.99                   | 7.92        | 91.0 ± 7.9         |
|                   |           |           | Competitive           | 0.97                   | 15.94       | 13.7 ± 4.6         |

$R^2$ , the Coefficient of Determination, gives information about the fit of the measured data to the different models tested, and the model with the highest  $R^2$  value provides the best data fit.

The  $Sy.x$  represents the Standard Deviation of the Residuals, and the model with the lowest  $Sy.x$  value provides the best prediction of the data.

In all cell suspensions assays, the best fit inhibition Models (highlighted in bold) gave the highest  $R^2$  and lowest  $Sy.x$  values, and the kinetic parameters extracted from the best fit models are included in the main text.

**Table S10.** Primers and probes used in this study [18].

| <b>Target DNA</b>               | <b>Primer and Probe sets</b> | <b>Sequence (5' – 3')</b>   |
|---------------------------------|------------------------------|-----------------------------|
| Total Bacteria<br>16S rRNA gene | Bac1055YF                    | ATGGYTGTCGTCAGCT            |
|                                 | Bac1392R                     | ACGGGCGGTGTGTAC             |
|                                 | Bac1115-probe                | FAM-CAACGAGCGCAACCC-MGB     |
| Total Archaea<br>16S rRNA gene  | Mtgen835F                    | GGGRAGTACGKYCGCAAG          |
|                                 | Mtgen918R                    | GAVTCCAATTRARCCGCA          |
|                                 | Mtgen831-probe               | FAM-CCAATTCCTTTAAGTTTCA-MGB |

**Table S11.** Growth yield calculations based on qPCR enumeration of archaeal 16S rRNA genes in axenic *M. barkeri* and methanogenic mixed cultures.

| Culture           | Substrate      | N <sub>2</sub> O<br>( $\mu$ M) | Methanogen 16S rRNA gene<br>copies mL <sup>-1</sup> |                                             | CH <sub>4</sub> yield<br>( $\mu$ mol) | Methanogen Yield <sup>a</sup><br>(16S rRNA gene<br>copies $\mu$ mol CH <sub>4</sub> <sup>-1</sup> ) |
|-------------------|----------------|--------------------------------|-----------------------------------------------------|---------------------------------------------|---------------------------------------|-----------------------------------------------------------------------------------------------------|
|                   |                |                                | Inoculum                                            | Final                                       |                                       |                                                                                                     |
| <i>M. barkeri</i> | Acetate        | 0                              | 1.68( $\pm$ 0.21) $\times$ 10 <sup>6</sup>          | 3.73( $\pm$ 1.06) $\times$ 10 <sup>9</sup>  | 580.6 $\pm$ 7.4                       | 6.43( $\pm$ 2.03) $\times$ 10 <sup>6</sup>                                                          |
|                   | Acetate        | 20                             | 1.68( $\pm$ 0.21) $\times$ 10 <sup>6</sup>          | 6.05( $\pm$ 1.20) $\times$ 10 <sup>7</sup>  | 20.2 $\pm$ 1.7                        | 4.52( $\pm$ 0.71) $\times$ 10 <sup>6</sup>                                                          |
|                   | Acetate        | 50                             | 1.68( $\pm$ 0.21) $\times$ 10 <sup>6</sup>          | 9.24( $\pm$ 1.10) $\times$ 10 <sup>7</sup>  | 19.1 $\pm$ 1.4                        | 3.13( $\pm$ 0.91) $\times$ 10 <sup>6</sup>                                                          |
| <i>M. barkeri</i> | H <sub>2</sub> | 0                              | 1.68( $\pm$ 0.21) $\times$ 10 <sup>6</sup>          | 7.54( $\pm$ 1.91) $\times$ 10 <sup>8</sup>  | 317.0 $\pm$ 2.8                       | 2.37( $\pm$ 0.62) $\times$ 10 <sup>6</sup>                                                          |
|                   | H <sub>2</sub> | 50                             | 1.68( $\pm$ 0.21) $\times$ 10 <sup>6</sup>          | 2.15( $\pm$ 0.19) $\times$ 10 <sup>8</sup>  | 315.5 $\pm$ 3.0                       | 0.68( $\pm$ 0.07) $\times$ 10 <sup>6</sup>                                                          |
|                   | H <sub>2</sub> | 100                            | 1.68( $\pm$ 0.21) $\times$ 10 <sup>6</sup>          | 0.13( $\pm$ 0.04) $\times$ 10 <sup>8</sup>  | 33.4 $\pm$ 5.8                        | 0.37( $\pm$ 0.09) $\times$ 10 <sup>6</sup>                                                          |
| <i>M. barkeri</i> | MeOH           | 0                              | 1.68( $\pm$ 0.21) $\times$ 10 <sup>6</sup>          | 10.10( $\pm$ 0.85) $\times$ 10 <sup>9</sup> | 635.8 $\pm$ 1.2                       | 1.59( $\pm$ 0.14) $\times$ 10 <sup>7</sup>                                                          |
|                   | MeOH           | 100                            | 1.68( $\pm$ 0.21) $\times$ 10 <sup>6</sup>          | 3.64( $\pm$ 0.73) $\times$ 10 <sup>9</sup>  | 629.6 $\pm$ 5.0                       | 0.58( $\pm$ 0.13) $\times$ 10 <sup>7</sup>                                                          |
|                   | MeOH           | 200                            | 1.68( $\pm$ 0.21) $\times$ 10 <sup>6</sup>          | 0.13( $\pm$ 0.06) $\times$ 10 <sup>9</sup>  | 48.6 $\pm$ 5.2                        | 0.27( $\pm$ 0.14) $\times$ 10 <sup>7</sup>                                                          |
| Mixed             | Acetate        | 0                              | 1.02( $\pm$ 0.03) $\times$ 10 <sup>6</sup>          | 1.44( $\pm$ 0.11) $\times$ 10 <sup>9</sup>  | 589.1 $\pm$ 23.6                      | 2.42( $\pm$ 0.18) $\times$ 10 <sup>6</sup>                                                          |
|                   | Acetate        | 10                             | 1.02( $\pm$ 0.03) $\times$ 10 <sup>6</sup>          | 0.32( $\pm$ 0.19) $\times$ 10 <sup>9</sup>  | 267.9 $\pm$ 33.2                      | 1.15( $\pm$ 0.73) $\times$ 10 <sup>6</sup>                                                          |
|                   | Acetate        | 30                             | 1.02( $\pm$ 0.03) $\times$ 10 <sup>6</sup>          | 0.09( $\pm$ 0.02) $\times$ 10 <sup>9</sup>  | 1.2 $\pm$ 1.3                         | <sup>-b</sup>                                                                                       |
| Mixed             | H <sub>2</sub> | 0                              | 7.45( $\pm$ 0.77) $\times$ 10 <sup>3</sup>          | 5.01( $\pm$ 2.33) $\times$ 10 <sup>7</sup>  | 316.0 $\pm$ 5.2                       | 1.59( $\pm$ 0.78) $\times$ 10 <sup>5</sup>                                                          |
|                   | H <sub>2</sub> | 10                             | 7.45( $\pm$ 0.77) $\times$ 10 <sup>3</sup>          | 0.35( $\pm$ 0.32) $\times$ 10 <sup>7</sup>  | 67.9 $\pm$ 11.5                       | 0.60( $\pm$ 0.05) $\times$ 10 <sup>5</sup>                                                          |
|                   | H <sub>2</sub> | 30                             | 7.45( $\pm$ 0.77) $\times$ 10 <sup>3</sup>          | 0.11( $\pm$ 0.00) $\times$ 10 <sup>7</sup>  | 0.03 $\pm$ 0.03                       | <sup>-b</sup>                                                                                       |
| Mixed             | MeOH           | 0                              | 2.90( $\pm$ 0.00) $\times$ 10 <sup>6</sup>          | 8.62( $\pm$ 1.02) $\times$ 10 <sup>9</sup>  | 541.5 $\pm$ 55.2                      | 1.59( $\pm$ 0.21) $\times$ 10 <sup>7</sup>                                                          |
|                   | MeOH           | 10                             | 2.90( $\pm$ 0.00) $\times$ 10 <sup>6</sup>          | 0.12( $\pm$ 0.04) $\times$ 10 <sup>9</sup>  | 225.9 $\pm$ 22.6                      | 0.05( $\pm$ 0.02) $\times$ 10 <sup>7</sup>                                                          |
|                   | MeOH           | 30                             | 2.90( $\pm$ 0.00) $\times$ 10 <sup>6</sup>          | 0.18( $\pm$ 0.08) $\times$ 10 <sup>9</sup>  | 2.4 $\pm$ 2.2                         | <sup>-b</sup>                                                                                       |

<sup>a</sup> The *M. barkeri* genome has three 16S rRNA gene copies, and the qPCR numbers were divided by a factor of three to obtain the cell numbers. The calculation of methanogen cell numbers in the mixed cultures assumed an average 16S rRNA gene content of 2.5.

<sup>b</sup> All of the mixed cultures that received 30  $\mu$ M N<sub>2</sub>O produced negligible amount of CH<sub>4</sub> and growth was not apparent.

**Table S12.** Relative abundances of archaeal taxa (as percentage of total Archaea detected) in methanogenic enrichment cultures grown with different substrates and exposed/unexposed to N<sub>2</sub>O. Values are derived from taxonomic classification of actual sequence variants (ASVs) generated by analyses of 16S rRNA gene amplicon sequencing data.

| Taxonomic Classification       |                                 |                              | H <sub>2</sub>      |                               | Acetate             |                               | MeOH                |                               |
|--------------------------------|---------------------------------|------------------------------|---------------------|-------------------------------|---------------------|-------------------------------|---------------------|-------------------------------|
| Order                          | Family                          | Genus                        | no N <sub>2</sub> O | N <sub>2</sub> O <sup>a</sup> | no N <sub>2</sub> O | N <sub>2</sub> O <sup>a</sup> | no N <sub>2</sub> O | N <sub>2</sub> O <sup>a</sup> |
| <i>Methanobacteriales</i>      | <i>Methanobacteriaceae</i>      | unidentified                 | 53.97%              | 55.06%                        | 0.08%               | 0.00%                         | 0.00%               | 0.00%                         |
| <i>Methanobacteriales</i>      | <i>Methanobacteriaceae</i>      | <i>Methanobacterium</i>      | 46.00%              | 44.91%                        | 2.54%               | 1.79%                         | 0.18%               | 0.45%                         |
| <i>Methanomicrobiales</i>      | <i>Methanomicrobiaceae</i>      | <i>Methanoculleus</i>        | 0.00%               | 0.00%                         | 1.21%               | 0.23%                         | 0.00%               | 0.00%                         |
| <i>Methanomicrobiales</i>      | <i>Methanomicrobiaceae</i>      | <i>Methanofollis</i>         | 0.00%               | 0.00%                         | 0.08%               | 0.00%                         | 0.00%               | 0.00%                         |
| <i>Methanosarciniales</i>      | <i>Methanosaetaceae</i>         | <i>Methanosaeta</i>          | 0.00%               | 0.00%                         | 0.00%               | 0.00%                         | 0.00%               | 0.32%                         |
| <i>Methanosarciniales</i>      | <i>Methanosarcinaceae</i>       | <i>Methanomethylovorans</i>  | 0.03%               | 0.00%                         | 0.00%               | 0.00%                         | 90.54%              | 84.20%                        |
| <i>Methanosarciniales</i>      | <i>Methanosarcinaceae</i>       | <i>Methanosarcina</i>        | 0.00%               | 0.00%                         | 96.09%              | 97.98%                        | 0.74%               | 0.95%                         |
| <i>Methanomassiliicoccales</i> | <i>Methanomassiliicoccaceae</i> | <i>Methanomassiliicoccus</i> | 0.00%               | 0.02%                         | 0.00%               | 0.00%                         | 8.48%               | 14.08%                        |
| <i>Methanomassiliicoccales</i> | <i>Methanomassiliicoccaceae</i> | uncultured                   | 0.00%               | 0.00%                         | 0.00%               | 0.00%                         | 0.07%               | 0.00%                         |
| <i>Methanomassiliicoccales</i> | <i>Methanomethylophilaceae</i>  | Ca. <i>Methanogranum</i>     | 0.00%               | 0.01%                         | 0.00%               | 0.00%                         | 0.00%               | 0.00%                         |

<sup>a</sup> Cultures was provided with 100 μM N<sub>2</sub>O at the start of the sixth transfers.

## References

1. Sander R. Compilation of Henry's law constants for inorganic and organic species of potential importance in environmental chemistry. Max-Planck Institute of Chemistry, Air Chemistry Department Mainz, Germany; 1999.
2. Sander R. Compilation of Henry's law constants (version 4.0) for water as solvent. *Atmos Chem Phys*. 2015;15(8):4399-4981.
3. Yin Y, Yan J, Chen G, Murdoch FK, Pfisterer N, Löffler FE. Nitrous oxide is a potent inhibitor of bacterial reductive dechlorination. *Environ Sci Technol*. 2018;53(2):692-701.
4. Fukagawa Y, Sakamoto M, Ishikura T. Micro-computer analysis of enzyme-catalyzed reactions by the Michaelis-Menten equation. *Agri Biol Chem*. 1985;49(3):835-837.
5. Michaelis L, Menten ML. Die Kinetik der Invertinwirkung. *Biochem Zeitschrift*. 1913;49:333-369.
6. Herlemann DPR, Labrenz M, Jürgens K, Bertilsson S, Waniek JJ, Andersson AF. Transitions in bacterial communities along the 2000 km salinity gradient of the Baltic Sea. *The ISME J*. 2011;5(10):1571-1579.
7. Bolyen E, Rideout JR, Dillon MR, Bokulich NA, Abnet CC, Al-Ghalith GA, et al. Reproducible, interactive, scalable and extensible microbiome data science using QIIME 2. *Nature Biotechnol*. 2019;37(8):852-857.
8. Martin M. Cutadapt removes adapter sequences from high-throughput sequencing reads. *EMBnet J*. 2011;17(1):10-12.
9. Callahan BJ, McMurdie PJ, Rosen MJ, Han AW, Johnson AJA, Holmes SP. DADA2: high-resolution sample inference from Illumina amplicon data. *Nat Methods*. 2016;13(7):581-583.
10. Quast C, Pruesse E, Yilmaz P, Gerken J, Schweer T, Yarza P, et al. The SILVA ribosomal RNA gene database project: improved data processing and web-based tools. *Nucleic Acids Res*. 2012;41(D1):D590-D596.
11. Chen I-MA, Chu K, Palaniappan K, Pillay M, Ratner A, Huang J, et al. IMG/M v.5.0: an integrated data management and comparative analysis system for microbial genomes and microbiomes. *Nucleic Acids Res*. 2018;47(D1):D666-D677.
12. Li W, Godzik A. Cd-hit: a fast program for clustering and comparing large sets of protein or nucleotide sequences. *Bioinformatics*. 2006;22(13):1658-1659.
13. Katoh K, Standley DM. MAFFT Multiple Sequence Alignment Software Version 7: Improvements in Performance and Usability. *Mol Biol Evol*. 2013;30(4):772-780.
14. Capella-Gutiérrez S, Silla-Martínez JM, Gabaldón T. trimAl: a tool for automated alignment trimming in large-scale phylogenetic analyses. *Bioinformatics*. 2009;25(15):1972-1973.
15. Stamatakis A. RAxML version 8: a tool for phylogenetic analysis and post-analysis of large phylogenies. *Bioinformatics*. 2014;30(9):1312-1313.
16. Miller MA, Pfeiffer W, Schwartz T, editors. Creating the CIPRES Science Gateway for inference of large phylogenetic trees. 2010 Gateway Computing Environments Workshop (GCE); 2010 14-14 Nov. 2010.
17. Letunic I, Bork P. Interactive tree of life (iTOL) v3: an online tool for the display and annotation of phylogenetic and other trees. *Nucleic Acids Res*. 2016;44(W1):W242-W245.
18. Kleindienst S, Chourey K, Chen G, Murdoch RW, Higgins SA, Iyer R, et al. Proteogenomics reveals novel reductive dehalogenases and methyltransferases expressed during anaerobic dichloromethane metabolism. *Appl Environ Microbiol*. 2019;85(6):e02768-02718.
